1  
2  
3  
4  
5  
6  
7  
8  
9  
10  
11  
12  
13  
14  
15  
16  
17  
18  
19  
20  
21  
22  
23  
24  
25  
26  
27  
28  
29  
30

## Reconstructing the human genetic history of mainland Southeast Asia: insights from genome-wide data from Thailand and Laos

Wibhu Kutanan<sup>1,#\*</sup>, Dang Liu<sup>2,#</sup>, Jatupol Kampaunsai<sup>3,4</sup>, Metawee Srikummool<sup>5</sup>, Suparat Srithawong<sup>1</sup>, Rasmi Shoocongdej<sup>6</sup>, Sukrit Sangkhano<sup>7</sup>, Sukhum Ruangchai<sup>8</sup>, Pittayawat Pittayaporn<sup>9</sup>, Leonardo Arias<sup>2,10</sup>, Mark Stoneking<sup>2,\*</sup>

<sup>1</sup>Department of Biology, Faculty of Science, Khon Kaen University, Khon Kaen 40002, Thailand

<sup>2</sup>Department of Evolutionary Genetics, Max Planck Institute for Evolutionary Anthropology, Leipzig 04103, Germany

<sup>3</sup>Department of Biology, Faculty of Science, Chiang Mai University, Chiang Mai 50202, Thailand

<sup>4</sup>Research Center in Bioresources for Agriculture, Industry and Medicine, Chiang Mai University, Chiang Mai 50202, Thailand

<sup>5</sup>Department of Biochemistry, Faculty of Medical Science, Naresuan University, Phitsanulok 65000, Thailand

<sup>6</sup>Department of Archaeology, Faculty of Archaeology, Silpakorn University, Bangkok 10200, Thailand

<sup>7</sup>School of Public Health, Walailak University, Nakhon Si Thammarat 80161, Thailand

<sup>8</sup>Department of Physics, Faculty of Science, Khon Kaen University, Khon Kaen 40002, Thailand

<sup>9</sup>Department of Linguistics and Southeast Asian Linguistics Research Unit, Faculty of Arts, Chulalongkorn University, Bangkok 10330, Thailand

<sup>10</sup>Centre for Linguistics, Faculty of Humanities, Leiden University, Leiden, The Netherlands

#These two authors are co-first authors and contributed equally to this work.

### \*Corresponding authors:

1. Professor Dr. Mark Stoneking (E-mail: [stoneking@eva.mpg.de](mailto:stoneking@eva.mpg.de))

2. Associated Professor Dr. Wibhu Kutanan (Email: [wibhu@kku.ac.th](mailto:wibhu@kku.ac.th))

**Conflict of interest:** The authors declare no conflict of interest.

### Author Contributions

W.K. and M.S. conceived and designed the project; W.K., R.S., M.Sr., S.R., S.Sa., P.P., S.S. and J.K. collected samples; W.K. and L.A. generated data; W.K. and D.L. carried out the data analyses; W.K., D.L. and M.S. wrote the article with input from all coauthors.

## 1 **Abstract**

2 Thailand and Laos, located in the center of Mainland Southeast Asia (MSEA), harbor diverse  
3 ethnolinguistic groups encompassing all five language families of MSEA: Tai-Kadai (TK),  
4 Austroasiatic (AA), Sino-Tibetan (ST), Hmong-Mien (HM) and Austronesian (AN). Previous genetic  
5 studies of Thai/Lao populations have focused almost exclusively on uniparental markers and there is a  
6 paucity of genome-wide studies. We therefore generated genome-wide SNP data for 33 ethnolinguistic  
7 groups, belonging to the five MSEA language families from Thailand and Laos, and analysed these  
8 together with data from modern Asian populations and SEA ancient samples. Overall, we find genetic  
9 structure according to language family, albeit with heterogeneity in the AA-, HM- and ST-speaking  
10 groups, and in the hill tribes, that reflects both population interactions and genetic drift. For the TK  
11 speaking groups, we find localized genetic structure that is driven by different levels of interaction with  
12 other groups in the same geographic region. Several Thai groups exhibit admixture from South Asia,  
13 which we date to ~600-1000 years ago, corresponding to a time of intensive international trade networks  
14 that had a major cultural impact on Thailand. An AN group from Southern Thailand shows both South  
15 Asian admixture as well as overall affinities with AA-speaking groups in the region, suggesting an  
16 impact of cultural diffusion. Overall, we provide the first detailed insights into the genetic profiles of  
17 Thai/Lao ethnolinguistic groups, which should be helpful for reconstructing human genetic history in  
18 MSEA and selecting populations for participation in ongoing whole genome sequence and biomedical  
19 studies.

20

21 **Keywords:** genome-wide, Mainland Southeast Asia, population interaction, South Asian admixture,  
22 cultural diffusion

23

## 24 **Introduction**

25 Mainland Southeast Asia (MSEA), consisting of Myanmar, Cambodia, Vietnam, western  
26 Malaysia, Laos, and Thailand, is a region of enormous diversity, with a population of ~263 million  
27 people speaking ~229 languages belonging to 5 major language families: Tai-Kadai (TK), Austroasiatic  
28 (AA), Sino-Tibetan (ST), Hmong-Mien (HM), and Austronesian (AN) (Eberhard, Simons and Fennig,  
29 2020). Thailand and Laos are in the center of MSEA, and are characterised by a diverse landscape  
30 involving highlands and lowlands, long coastlines, and many rivers. North-vs.-south movements are  
31 facilitated by several rivers, including the Mekong, Chao Phraya, and Salween which are considered  
32 to be a key factor for population movement from southern China and upper MSEA to lower MSEA. In  
33 addition, the Malay Peninsula to the south acts as a cross-road, facilitating east-vs.-west movement by  
34 sea and by the narrow width of the Kra Isthmus (the narrowest part of the Malay Peninsula).

1           The geographic heterogeneity of Thailand and Laos is reflected in the ethnolinguistic diversity  
2 of the region. There are ~68.6 million people in Thailand and ~6.8 million in Laos, speaking ~159  
3 languages belonging to all five major MSEA language families (Eberhard, Simons and Fennig, 2020).  
4 TK languages are widespread in southern China and MSEA, and are quite prevalent in present-day  
5 Thailand, and Laos, spoken by 89.4% of Thais and 65.7% of Laotians. The major TK speaking groups  
6 in northern, northeastern, central and southern Thailand are known as Khonmueang, Lao Isan, Central  
7 Thai, and Southern Thai or Khon Tai, respectively (Eberhard, Simons and Fennig, 2020). AA languages  
8 are next in predominance, spoken by 4.0% of Thais and 26.2% of Laotians. In addition, this area is also  
9 inhabited by historical migrants who speak ST, HM, and AN languages (frequencies of 3.2%, 0.2%,  
10 and 2.8%, respectively, in Thailand; and 2.9%, 4.7%, and 0% in Laos) (Eberhard, Simons and Fennig,  
11 2020). The AA, HM, and ST languages are spoken mainly by highlanders (the hill tribes) in northern  
12 and western Thailand, and in midland and upland regions in Laos, although AA languages are also  
13 spoken by some lowland groups, e.g. the Mon. AN-speaking groups, such as the Thai Malay  
14 (SouthernThai\_AN), are distributed in the Southern Provinces of Thailand, bordering with Malaysia.

15           Archaeological records document a long history of human occupation of the area, with modern  
16 human remains dated to 46-63 thousand years ago (kya) in northern Laos (Demeter et al., 2012). In  
17 addition, cultural remains of SEA hunter-gatherers (e.g. flake stone tools of the Hòabinhian culture)  
18 have been found in northern Thailand dating to 35-40 kya (Shoocongdej, 2006), and in southern  
19 Thailand dating to 27-38 kya (Anderson, 1990). The transition from a hunter-gatherer tradition to a  
20 Neolithic agricultural lifestyle occurs ~4 kya all across Thailand and Laos (Higham and Thodsarat,  
21 2012; Higham, 2014); agriculture in MSEA probably has its origins in the valley of the Yangtze River  
22 in China (Higham and Thodsarat, 2012), and ancient DNA evidence indicates that present-day AA  
23 speaking groups in MSEA are most closely related to Neolithic agricultural communities (McColl et  
24 al., 2018; Lipson et al., 2018).

25           However, the common languages shared by Thais and Laotians are TK languages, not AA  
26 languages. The origin of the TK languages is thought to be in what is now southern or southeastern  
27 China, and they probably spread to MSEA during the Iron Age (Pittayaporn, 2014). Whether the spread  
28 of TK languages occurred via demic diffusion (an expansion of people that brought both their genes  
29 and their language) or cultural diffusion (language spread with at most minor movement of people) has  
30 been debated (Nakbunlung, 1994; Sangvichien, 1966; Pittayaporn, 2014). Previous genetic studies of  
31 uniparental lineages have generally supported demic diffusion for the maternal side but cultural  
32 diffusion from the AA people for the paternal side for major Thai/Lao TK groups (Kutanan et al., 2017,  
33 2018b, 2019). Archaeological evidence suggests other population contacts in the region, e.g. objects  
34 from India that appear during the late Bronze Age and Iron Age and involve the AA-speaking Khmer  
35 and Mon (Higham and Thodsarat, 2012; Higham, 2014). Moreover, the HM- and ST-speaking hill tribes  
36 in the mountainous areas of northern Thailand, northern Myanmar, northern Laos and southern China

1 migrated to the region during historical times, ~200 years ago (ya) (Schliesinger, 2000; Penth and  
2 Forbes, 2004). Taken together, the archaeological and linguistic evidence suggests a complex  
3 population structure and history of the ethnolinguistic groups of Thailand and Laos.

4 This population structure and history remains largely unexplored by genetic studies, which have  
5 almost exclusively analyzed autosomal short tandem repeat (STR) loci, and mitochondrial DNA  
6 (mtDNA) and male specific Y chromosome (MSY) sequences. These studies revealed the relative  
7 genetic heterogeneity of the AA groups and homogeneity of TK groups (Kampuansai et al., 2017, 2020;  
8 Kutanan et al., 2014, 2017, 2019; Srithawong et al., 2015, 2020) and contrasting male and female  
9 genetic histories in the region, especially for the matrilineal vs. patrilineal hill tribes (Oota et al., 2001;  
10 Besaggio et al., 2007; Kutanan et al., 2018a, 2019, 2020). While genome-wide data provide much richer  
11 insights into population structure and genetic history, previous genome-wide studies of Thai/Lao  
12 populations are either primarily from northern populations (HUGO Pan-Asian SNP Consortium, 2009;  
13 Xu et al., 2010; Lipson et al., 2018) or do not provide any information on ethnolinguistic background  
14 (Wangkumhang et al., 2013; Lazaridis et al., 2014). Therefore, we here generated genome-wide SNP  
15 data for 452 individuals from 33 ethnolinguistic groups from Thailand and Laos, including two southern  
16 Thai groups that have not been involved in any previous genetic studies, speaking languages that  
17 encompass all five language families in MSEA. We analysed the allele and haplotype sharing within  
18 and between the Thai/Lao groups, and compared them with both modern Asian populations and nearby  
19 SEA ancient samples. Our results provide several new insights into the genetic prehistory of MSEA  
20 through the lens of populations from Thailand and Laos.

21

## 22 **Results**

### 23 *Genetic structure and genetic relationships within and between Thai/Lao and other Asian* 24 *populations*

#### 25 *Principal Components Analysis (PCA)*

26 We generated genome-wide SNP data for 452 individuals from 32 populations from Thailand  
27 and one population from Laos; when combined with previously published data from three Thai  
28 populations (Lipson et al., 2018; Lazaridis et al., 2014), there are 482 Thai/Lao samples belonging to  
29 36 populations (Figure 1). We also merged our data with data from modern Asian populations generated  
30 on the same platform and SEA ancient samples (Supplementary Table 1; Supplementary Figure 1). We  
31 began with PCA to investigate the overall population structure of the merged dataset and identify any  
32 outliers (Supplementary Figure 2). After outliers were removed, PC1 separates South Asian (SA) from  
33 East Asian (EA) groups, with the Kharia (#44), Onge (#45), and Uygur (#65) located in between (Figure  
34 2A; Supplementary Figure 3). PC2 separates Northeast Asian (NEA) groups from SEA groups. With  
35 respect to the major MSEA linguistic groups, ST and HM groups are generally separated from the AA,

1 TK, and AN groups on PC2, while the latter three overlap one another. Exceptionally, the Karen  
2 speaking ST groups (Karen\_ST; #7-9) also overlap the AA, TK, and AN groups (Figure 2B), while the  
3 ST-speaking Lahu from Thailand (#6) and China (#56) and the HM-speaking IuMien (#3) are grouped  
4 with the AA-speaking Kinh (#52) and close to the northern Thai TK groups (N\_TK; #21-26). Strikingly,  
5 four Thai groups from this study, i.e. the AA-speaking Mon (#20), AN-speaking SouthernThai\_AN  
6 (#4), and TK-speaking CentralThai (#34) and SouthernThai\_TK (#35), as well as the previously-  
7 published Thai-HO (#36; this population is from the Human Origins dataset of Lazaridis et al., 2014,  
8 with no further details available), Mamanwa (#46) and Cambodian (#51), all show additional affinity  
9 toward the SA populations (Figure 2A-B).

10 Based on the PCA (Figure 2B), the Thai AA speaking groups can be roughly divided into three  
11 groups: Palaungic\_AA (Lawa\_Western, Lawa\_Eastern, Palaung and Blang; #10-13); Khmu\_Katu\_AA  
12 (Khmu, HtinPray, HtinMal, Mlabri, Soa and Bru; #14-19); and Monic\_AA (Mon; #20). This grouping  
13 is also consistent with their linguistic classification, e.g. Palaungic, Khmuic and Katuic, and Monic  
14 (Diffloth, 2005; Sidwell, 2014). The TK groups from different geographic regions in Thailand show  
15 different relationships; the N\_TK groups are close to the Palaungic\_AA groups, AA-speaking Kinh,  
16 AN groups from Taiwan (#49-50) and the Philippines (#46), while the northeastern Thai TK groups  
17 (NE\_TK; Black Tai, Lao Isan, Phutai, Nyaw, Saek and Kalueang; #27 and #29-33) are close to the  
18 Khmu\_Katu\_AA groups. The TK speaking Laotian (#28) are grouped with the NE\_TK groups. The  
19 central and southern Thai TK groups (C\_TK and S\_TK; CentralThai and SouthernThai\_TK; #34 and  
20 #35) and Thai-HO (#36) are close to the Monic\_AA groups. Interestingly, the AN-speaking group from  
21 Thailand (SouthernThai\_AN; #4), is not close to the AN groups from Taiwan (Ami and Atayal) or  
22 Indonesia (Semende and Borneo; #47-48), but rather they are near the AN-speaking Negrito group  
23 Mamanwa (#46) from the Philippines, and the Monic\_AA, C\_TK and S\_TK groups. Notably, we found  
24 two distinct clusters of Mamanwa groups, one is close to N\_TK groups, while the other is placed with  
25 those groups toward the SA side.

26 When ancient samples are included in the PCA (Supplementary Figure 3), the two Hòabinhian  
27 samples (#69-70) are projected close to the Onge, while most of the Neolithic samples (#71-79) fall  
28 with the AA and AN groups. However, the N-Oakaie sample (#78) from Myanmar is closer to ST and  
29 HM groups. Most of the Bronze/Iron Ages samples (#80-82) cluster with the TK and AA samples except  
30 for the BA-NuiNap samples (#80) from Vietnam, which are close to the Neolithic samples.

31

### 32 *ADMIXTURE analysis*

33 We then performed ADMIXTURE analysis to investigate population structure. The lowest  
34 cross validation error occurred at  $K = 5$  and  $K = 6$  (Supplementary Figure 4); corresponding results are  
35 shown in Figure 2C. For  $K = 5$ , there is a brown component associated with Mbuti, a pink component

1 appearing in French and Indian groups, a purple component enriched in NEA groups, a black component  
2 dominant in AN-speaking Ami and Atayal from Taiwan, and a blue component enriched in  
3 Khmu\_Katu\_AA groups from Thailand. Most of the Thai/Lao TK-speaking groups show two major  
4 sources (black and blue) with the purple component as a minor source, except that the C\_TK and S\_TK  
5 groups and Thai-HO have a substantial fraction of the pink component, as do the Monic\_AA and  
6 Southern Thai\_AN. This indication of potential relatedness with SA groups is consistent with the PCA  
7 results (Figure 2A-2B). Also in accordance with the PCA results, the AA-speaking groups can be  
8 categorized into 3 groups: the Palaungic\_AA group exhibits two major sources (blue and purple) with  
9 the black component as a minor source; the Monic\_AA group possesses the pink component; and the  
10 Khmu\_Katu\_AA group has a reduced frequency of the purple component.

11 With respect to the ancient samples at  $K = 5$  (Figure 2C), the Hòabinhian samples show a major  
12 pink component with minor blue and purple components, while all of the Neolithic samples exhibit a  
13 major blue component with minor black, pink, and purple components, except that the purple  
14 component is enriched in the N-Oakaie sample from Myanmar, and reduced/lacked in the N-  
15 GuaChaCave samples from Malaysia and the N-TamPaLing and N-TamHang samples from Laos. The  
16 purple component is also enriched in the Iron Age samples IA-LongLongRak from Thailand. The black  
17 component is substantially increased in the Bronze Age and historical samples, such as the BA-NuiNap  
18 and Hi-HonHaiCoTien samples from Vietnam and the Hi-SupuHujung and Hi-Kinabatagan samples  
19 from Malaysia (a similar pattern is seen in the Thai/Lao TK groups).

20 At  $K = 6$ , there appears a green component that separates French from South Asian populations  
21 (Figure 2C). This green component substantially reduces the pink component in the NEA groups, but  
22 has a negligible effect on the SA-related Thai groups. Although increasing  $K$  values are associated with  
23 higher cross-validation errors, the additional new components reveal additional population structure  
24 (Supplementary Figure 5). At  $K = 7, 8$  and  $9$ , the Lahu from Thailand and China, the Hmong\_HM, and  
25 Karen\_ST groups from Thailand are enriched for their own sources, respectively. At  $K = 11$ , the Soa  
26 and Bru (Katuic speaking populations of the Khmu\_Katu\_AA group) stand out with a light brown  
27 component, and in accordance with the PCA results, the different TK-speaking groups can be  
28 distinguished: the blue component is now enriched mostly in the N\_TK group, the additional light  
29 brown component is enriched in the NE\_TK group, and the C\_TK and S\_TK group possess the  
30 additional pink component as mentioned previously.

31

### 32 ***Outgroup $f_3$***

33 To further analyse population relationships based on allele sharing, we calculated outgroup  $f_3$ -  
34 statistics of the form  $f_3(X, Y; \text{outgroup})$  that measure the shared drift between populations X and Y  
35 since their divergence from the outgroup (Mbuti). Higher outgroup  $f_3$  values indicate more shared drift

1 between populations. The SouthernThai\_AN, Monic\_AA, C\_TK, and S\_TK groups and Thai-HO  
2 exhibit the lowest  $f_3$ -values with other populations/ancient samples and also with each other (Figure 3),  
3 while the HM speaking populations show the strongest sharing with each other. TK populations exhibit  
4 close genetic affinity with each other, except for the C\_TK, S\_TK, and Thai-HO groups, and also share  
5 alleles with the HM speaking populations, consistent with results of the ADMIXTURE analysis at  $K =$   
6 8 (Supplementary Figure 5).

7 There is higher sharing between the Thai/Lao groups and other SEA and southern Chinese  
8 groups (i.e. TK, HM, and non-NEA ST Chinese groups) than with SA and NEA groups (Figure 3). The  
9 highest sharing was between Thai Lahu and Chinese Lahu. The Ami and Atayal share more alleles with  
10 the TK groups than with the SouthernThai\_AN group from Thailand (Figure 3), in agreement with  
11 ADMIXTURE results (Figure 2C; Supplementary Figure 5). The ancient samples N-TamPaLing and  
12 N-TamHang share more with the Khmu\_Katu\_AA and NE\_TK groups, but N-Oakaie shares more with  
13 the ST-speaking Lisu and Lahu groups and HM-speaking Hmong and IuMien groups. The Iron Age  
14 samples show overall less allele-sharing with Thai/Lao groups, whereas the Bronze Age and historical  
15 samples from Vietnam and Malaysia show higher sharing with the Thai/Lao TK and HM groups (Figure  
16 3), in agreement with the ADMIXTURE results (Figure 2C).

17

### 18 *ChromoPainter*

19 To further investigate the ancestry profiles and recent past of Thai/Lao populations through  
20 haplotype-based methods, we used the ChromoPainter software (Lawson et al., 2012) and the genomes  
21 of modern Asian populations (including the Thai/Lao populations) as donors to paint the chromosomes  
22 of Thai/Lao populations. The process of “painting chromosomes” means defining the ancestry source  
23 of haplotypes along the chromosomes of a target individual by donors who share the most recent  
24 common ancestor.

25 We found the strongest signal is self-painting, except for the Laotian, SouthernThai\_AN,  
26 SouthernThai\_TK and Thai-HO which have a wider sharing profile (Figure 4A). Some finer structure  
27 within the AA groups is revealed: the Mon\_AA group shows excess sharing with Indian donors;  
28 Khmu\_Katu\_AA groups show strong intra-group sharing but less sharing with other groups except for  
29 between the Soa and most NE\_TK groups; Palaungic\_AA groups show various sharing patterns, e.g. a  
30 broad sharing profile of the Blang with several other groups vs. strong self-painting only of the Palaung,  
31 and strong sharing among the Lawa\_Eastern, Lawa\_Western, Karen\_ST groups and Shan. The  
32 relationships among Lawa, Karen\_ST and Shan are also seen in PCA (Figure 2B) and ADMIXTURE  
33 results (Supplementary Figure 5). Likewise, some finer structure within the Thai TK groups is revealed:  
34 N\_TK populations show strong sharing with each other and the Dai, though the Shan show additional  
35 sharing with the Lawa\_Eastern and Karen\_ST groups. The NE\_TK groups show strong sharing with

1 the Khmu\_Katu\_AA group, Cambodian, Borneo and Dai. Notably, the Laotian show a relatively  
2 broader sharing profile and high sharing with the HM groups, whereas the BlackTai show a strong self-  
3 painting profile. In addition to strong sharing with Khmu\_Katu\_AA groups, the C\_TK group shows an  
4 excess sharing with the Indian donors, which is similar to the profile of Thai-HO. The S\_TK group also  
5 shows a similar profile as C\_TK but additional sharing with the AN-speaking Mamanwa, Borneo and  
6 Semende, which is similar to the profile of the SouthernThai\_AN (who show even stronger and broader  
7 sharing with the other AN groups). The Thai HM groups show strong sharing with each other and the  
8 Chinese HM groups, especially the Miao. The IuMien show additional affinity to ST (especially Lahu)  
9 and N\_TK groups. For the Thai ST groups, the Lisu and Lahu show strong sharing with each other and  
10 the ST-speaking Chinese Lahu, Yi and Naxi. In contrast, the Karen\_ST groups show strong sharing  
11 with each other and the Lawa\_Eastern, Lawa\_Western and Shan.

12 To avoid the effects of self-painting, which is enhanced in isolated populations subject to drift,  
13 we conducted another ChromoPainter analysis in which we excluded individuals sampled from this  
14 study as donors. The three Thai groups from previous studies, HtinMal, Mlabri, and Thai-Ho, were still  
15 included as donors but were removed from being recipients, in order to capture some local ancestry  
16 from Thailand (Supplementary Figure 6). With self-painting not allowed, sharing profiles with the  
17 comparative Asian populations become more pronounced. In particular: the profile of the Palaung  
18 becomes more similar to other Palaungic\_AA groups; all of the Khmu\_Katu\_AA groups are highly  
19 painted by the HtinMal and Mlabri donors (who are also Khmu\_Katu\_AA groups), suggesting strong  
20 affinities among the Khmu\_Katu\_AA groups; the sharing profile of BlackTai with other groups is  
21 revealed to be similar to both N\_TK (sharing with the Dai) and NE\_TK (sharing with Borneo) groups.  
22 Previously-identified sharing profiles also become more obvious, e.g. high sharing between N\_TK and  
23 Dai donors, NE\_TK and AA donors (e.g. Cambodian and Kharia), and C\_TK and S\_TK and Indian  
24 donors.

25

### 26 ***Identity by descent (IBD)***

27 The IBD analysis generally captured the main features of the ChromoPainter results with less  
28 resolution for the sharing with populations outside Thailand/Laos (Figure 4B). However, the length of  
29 shared IBD segments provides a rough time frame for the interactions within/between populations  
30 (Ralph and Coop, 2013; Al-Asadi et al., 2019), and the number and length of IBD segments shared  
31 within a population can be used to infer population demography (Browning and Browning, 2015;  
32 Browning et al., 2018; Ceballos et al., 2018; Severson et al., 2019). We found that all AA (except for  
33 Mon and Blang), HM (except for IuMien), and ST groups exhibit high within-population IBD sharing  
34 (Supplementary Figure 7), with the Mlabri showing the greatest levels by far of within-group IBD  
35 sharing, in agreement with their enhanced self-painting in the ChromoPainter analysis (Figure 4A).



1 Most of these groups are hill tribes, suggesting strong drift effects in isolated groups in this remote  
2 mountainous area. Low levels of within-group IBD sharing, suggesting either population expansion or  
3 admixture, is observed in most TK and AN groups, who mostly occupy the lowlands and tend to exhibit  
4 broader sharing profiles in the ChromoPainter analyses (Figure 4A; Supplementary Figures 6-7).

5 The IBD sharing between populations was broken down into categories based on the length of  
6 shared IBD blocks, in order to infer the approximate time of interactions; the longer the shared IBD  
7 blocks, the more recent the interaction as there has been less time for recombination to shorten the IBD  
8 blocks. We analyzed three categories of IBD blocks: 1-5 cM, 5-10 cM, and >10 cM (Supplementary  
9 Figure 8); these correspond very roughly to time intervals of 1,500-2,500 ya, 500-1,500 ya, and 0-500  
10 ya, respectively (Ralph and Coop, 2013). Overall, all populations show some sharing with other  
11 populations, and most of the Thai/Lao groups share IBD blocks during the 1,500-2,500 ya interval. In  
12 general, shared IBD was restricted to populations from the same language family, as reflected in Figure  
13 4B: the Thai/Lao TK and AA populations share IBD segments with TK-speaking Chinese Dai and AA-  
14 speaking Cambodian, respectively; Thai HM populations share IBD segments with the HM-speaking  
15 Miao and She from China; and Thai ST groups share IBD segments with ST-speaking groups from  
16 China. Interestingly, an exception to this pattern of shared IBD restricted to populations from the same  
17 language family occurs in southern Thailand, where both SouthernThai\_TK and SouthernThai\_AN  
18 groups share IBD segments with the AA-speaking Mlabri, although the SouthernThai\_AN additionally  
19 share IBD segments with AN-speaking groups from Sumatra and Borneo. The pattern becomes much  
20 more localized in later periods, with sharing restricted to a few groups in northern and northeastern  
21 Thailand (Supplementary Figure 8).

22 We also estimated recent changes in effective population size within the past 50 generations  
23 using the IBD sharing within each individual population (Browning and Browning, 2015)  
24 (Supplementary Figure 9). Most populations show a decline around 20 generations ago that is followed  
25 either by a constant population size or a small increase, but SouthernThai\_TK, SouthernThai\_AN, and  
26 Thai-HO show population increases only beginning around 10-20 generations ago. This result  
27 emphasizes the difference between populations from southern/central Thailand vs. those from  
28 northern/northeastern Thailand and Laos. However, we caution that our estimation of effective  
29 population size is likely to be uncertain for populations with large effective population sizes in recent  
30 generations, due to the assumption of a constant growth rate and insufficient sample sizes for accurate  
31 estimation (Browning and Browning, 2015; Browning et al., 2018).

32

### 33 *Investigating shared ancestry with $f_4$ -statistics*

34 The  $f_4$ -statistics of the form  $f_4(W, X; Y, \text{Outgroup})$  were used to formally test whether  
35 population W or X shares more ancestry with population Y. We first investigated the relationships

1 among Thai/Lao groups from the same language family/subgroup by computing  $f_4$ -statistics of the form  
2 (group 1, group 2; group 3, Mbuti), where group 1 and group 2 are from the same language  
3 family/subgroup while group 3 is from a different language family/subgroup. By convention, a Z-score  
4  $> 3$  or  $< -3$  indicates that group 3 shares significant excess ancestry with group 1 or 2, respectively;  
5 nonsignificant Z-scores indicate that group 1 and 2 form a clade and share equivalent amounts of  
6 ancestry with group 3. The results indicate that there is no significant sharing of ancestry between HM  
7 or ST groups (except for Lahu, and Lisu with HM groups) and non-HM or non-ST groups, respectively  
8 (Supplementary Figure 10A-B; Supplementary Table 2). However, there are numerous instances of an  
9 AA or TK group sharing excess ancestry with a non-AA or non-TK group (Supplementary Figure 10C-  
10 10E; Supplementary Table 2); this heterogeneous ancestry sharing profile also reflects the putative  
11 South Asian ancestry in some AA and TK groups (Supplementary Figure 10C and 10E; Supplementary  
12 Table 2). In particular, the profiles of NE\_TK and N\_TK groups show strong excess sharing with each  
13 other and the HM groups, followed by ST and AA groups (Supplementary Figure 11A-11C;  
14 Supplementary Table 3). Many of the highest Z-scores come from comparisons involving the Laotian  
15 population (Supplementary Figure 10D and 11A; Supplementary Tables 2-3), in agreement with their  
16 broader haplotype sharing profiles (Figure 4). The profiles of Khmu\_Katu\_AA and Palaungic\_AA  
17 exhibit excess sharing with each other and higher excess sharing with the Karen\_ST groups than with  
18 the other ST groups, which is also consistent with the haplotype sharing profiles (Figure 4;  
19 Supplementary Figure 11D-11E; Supplementary Table 3). In addition, we found that Thai-HO and  
20 CentralThai form a clade in all the tests (Z scores within  $\pm 1.5$ ), suggesting their close relationship in  
21 agreement with previous analyses (Supplementary Figure 10E; Supplementary Table 2).

22 We further investigated whether any of the Thai/Lao groups share excess ancestry with  
23 representative East Asian groups, compared to Han Chinese, by computing  $f_4$ -statistics of the form  
24 (East Asian group, Han Chinese; Thai/Lao group, Mbuti). A Z-score  $> 3$  indicates that the Thai/Lao  
25 group shares excess ancestry with the East Asian groups, while a Z-score  $< -3$  indicates that the  
26 Thai/Lao group shares excess ancestry with Han Chinese; nonsignificant Z-scores indicate no excess  
27 ancestry sharing of the Thai/Lao group with either the East Asian group or Han Chinese. Based on the  
28 allele and haplotype sharing profiles (Figures 3-4), we used Atayal, Dai, Cambodian, Miao and Naxi as  
29 representative groups speaking AN, TK, AA, HM and ST languages, respectively. Almost all of the  
30 Thai/Lao TK groups and the SouthernThai\_AN population share excess ancestry with Atayal and Dai  
31 (Supplementary Figure 12), share more ancestry with Han than with Cambodian or Naxi (although the  
32 SouthernThai\_AN shares less excess ancestry with Cambodia than other Thai/Lao groups), and show  
33 either a slight excess sharing, or no excess sharing, with Miao. These results provide further support for  
34 a genetic relationship between TK and AN groups. In addition, the grouping among AA Thai/Lao  
35 groups was also supported by this test; the Monic\_AA show excess sharing only with the Dai, while  
36 the Khmu\_Katu\_AA and Palaungic\_AA groups are distinguished by the former sharing excess ancestry

1 with Atayal and having no significant Z-scores with Cambodian vs. Han, while the latter have no  
2 significant Z-scores with Atayal and share excess ancestry with Han when compared with Cambodian.  
3 These results suggest more AN/TK and AA related ancestry in the Khmu\_Katu\_AA group, and more  
4 Han related ancestry in the Palaungic\_AA group. The ST and HM populations are similar in their overall  
5 patterns to the Palaungic\_AA group, except that the HM populations share the most excess ancestry  
6 with the HM-speaking Miao, while the ST populations share less excess ancestry with Han than do  
7 most of the other Thai/Lao groups when compared to the ST-speaking Naxi.

8 We next used  $f_4$  (Thai/Lao group, Han; Indian group, Mbuti) to investigate the putative South  
9 Asian-related admixture shown by PCA and ADMIXTURE results (Figure 2), and the haplotype  
10 sharing profiles (Figures 4A). Several TK and AA Thai/Lao groups share significant excess ancestry  
11 with the AA-speaking Kharia (Supplementary Figure 13). By contrast, the Mon, SouthernThai\_TK and  
12 SouthernThai\_AN share excess ancestry with every other Indian group (but not the Kharia or Onge),  
13 and they are the only Thai/Lao groups to share excess ancestry with the other Indian groups. They are  
14 also the only groups (along with CentralThai) that share less ancestry with Onge than do Han. These  
15 results highlight the distinctive nature of the Indian-associated ancestry in the Mon and southern Thai  
16 groups, compared to other Thai/Lao groups.

17 We also performed an  $f_4$  analysis of the form  $f_4$  (ancient samples, Han; Thai/Lao groups,  
18 French), with only transversions (3,090-53,870 SNPs), to assess allele-sharing between the Thai/Lao  
19 groups and the ancient samples (Supplementary Figure 14). Most populations show no significant  
20 differences in ancestry sharing with the Hòabinhian samples vs. Han Chinese, except that the Mon and  
21 SouthernThai\_TK share more alleles with Han while Blang shares more allele with Ho-PhaFaen. Many  
22 of the Thai/Laos populations show significant ancestry sharing with most of the Neolithic samples;  
23 however, the Mon\_AA, C\_TK, S\_TK, and SouthernThai\_AN groups share excess ancestry with Han  
24 compared to the ancient samples, and this pattern becomes weaker in later periods.

25

## 26 ***Population histories investigated by admixture graphs***

27 Constructing admixture graphs, using either a combination of  $F$ -statistics or a covariance matrix  
28 of the allele frequencies, is another method to explore the shared genetic ancestry, admixture events  
29 and historical population divergence among multiple populations simultaneously (Nielsen, 2018).  
30 TreeMix (Pickrell and Pritchard, 2012) and AdmixtureBayes (Nielsen, 2018) analyses were first carried  
31 out to survey the potential admixture graphs based on the covariance matrix of allele frequencies, and  
32 then qpGraph (Patterson et al., 2012) was used to further test if these graphs provide a reasonable fit to  
33 the data, using a combination of  $F$ -statistics.

34 We began with a maximum-likelihood tree inferred by TreeMix with Mbuti (as the outgroup),  
35 French, South Asians (N\_Indian and Onge), representative East Asian groups (same as those used in

1 the  $f_4$  analyses), ancient samples with more than 130,000 overlapping SNPs (<65% missing data; these  
2 are Ho-PhaFaen, N-TamPaLing, N-GuaChaCave, IA-LongLongRak, and Hi-Kinabatagan), and  
3 Thai/Lao groups. The N\_Indian, TK, AA, Hmong\_HM, and Karen\_ST groups were grouped based on  
4 linguistic classification and ChromoPainter results (see Materials and Methods). The overall topologies  
5 with and without migration are similar, except for shifts involving a few groups (Supplementary Figure  
6 15A). The SouthernThai\_AN, S\_TK, Monic\_AA, C\_TK and Thai-HO, together with the ancient  
7 samples, fall outside a clade containing the remaining Thai/Lao groups and the representative East  
8 Asian groups.

9 The standard error of the residuals decreases from 15.6 to 12.3 when adding 3 migration events  
10 (Supplementary Figures 15B) and all groups from the same language family now form a clade except  
11 that the Karen\_ST is placed in the AA clade together with Neolithic/Iron Age samples (N-GuaChaCave,  
12 N-TamPaLing, and IA-LongLongRak); the AN-speaking Atayal falls in the TK clade; and the Southern  
13 Thai\_AN is placed in between the Hòabinhian-related Onge/Ho-PhaFaen and the historical Hi-  
14 Kinabatagan samples. There were three migrations inferred: one from N\_Indian to Mon\_AA and IA-  
15 LongLongRak; one from the ancestor of all samples after the divergence of N\_Indian and French to  
16 S\_TK, C\_TK, and Thai-HO; and one from the Hòabinhian sample to the Neolithic samples.

17 To investigate the genetic ancestry in each language family, we built admixture graphs using  
18 AdmixtureBayes, and then further investigated these admixture graphs with qpGraph (Figure 5). To  
19 begin with, we built a backbone admixture graph with the outgroup Mbuti, N\_Indian, and the  
20 representative East Asian groups (Figure 5A); the first split separates the N\_Indian from the East Asian  
21 groups, then the Naxi are separated from the other groups. The ancestor of Atayal and Dai is admixed  
22 from ancestors of N\_Indian and Miao with 6% and 94% ancestry, respectively. The ancestor of  
23 Cambodian is admixed with 73% ancestry from the ancestor of Dai and 27% from the ancestor of all  
24 East Asian groups. We then explored graphs for groups from each language family. For the  
25 SouthernThai\_AN group (Figure 5B), the Indian-related ancestor contributes 27% ancestry to the  
26 SouthernThai\_AN, with the remaining 73% contributed by an admixed ancestor with AA- and AN-  
27 related ancestry. For the four TK groups (Figure 5C), the NE\_TK and N\_TK groups are in the same  
28 clade, and this clade contributes 88% to C\_TK and 83% to S\_TK. The remaining ancestry for C\_TK  
29 and S\_TK is contributed by Indian-related ancestry, which reflects SA-related admixture that is  
30 consistent with previous results (Figures 2 and 4A; Supplementary Figure 13). This graph does not  
31 include any EA source populations as their inclusion leads to unacceptable graphs (worst-fitting  $Z = -$   
32  $7.037$ ; Supplementary Figure 16), probably because the Dai have broad attraction to all the TK groups  
33 as well as Atayal and Cambodian, as most of the outlier  $Z$ -scores involve the Dai. However, this graph  
34 still provides essentially the same topology for the TK groups as in Figure 5C with the N\_TK now  
35 forming a clade with the Dai and Atayal while the NE\_TK share more ancestry with Cambodian. To  
36 reduce complexity/redundancy in the modelling, we did not include the Thai-HO in the graph as their

1 ethnolinguistic background is unclear and their genetic profile is very similar to C\_TK (Supplementary  
2 Figure 10E; Supplementary Table 2). The graph of AA groups (Figure 5D) includes several admixture  
3 events, and indicates that the Khmu\_Katu\_AA and Palaungic\_AA subgroups are more closely-related,  
4 while the Monic\_AA subgroup is distinguished from these by N-Indian-related ancestry, in agreement  
5 with previous results (Figures 2 and 4A; Supplementary Figure 13). For the HM groups (Figure 5E),  
6 there is a divergence between the Dai and a Miao-Hmong clade, while the IuMien are admixed with  
7 29% ancestry from an ancestor of the Hmong and 71% from an ancestor of the Dai. The additional TK-  
8 related ancestry in IuMien is consistent with haplotype-sharing and  $f_4$  results (Figure 4; Supplementary  
9 Figure 12). The graph of ST groups indicates that Lisu, Lahu and Naxi form a clade, while the Karen\_ST  
10 have additional Cambodian-related ancestry (Figure 5F); this AA-related admixture in the Karen is in  
11 agreement with the haplotype-sharing and Treemix results (Figure 4, Supplementary Figure 15).

12

### 13 ***South Asian-related admixture investigation***

14 The results of PCA, ADMIXTURE, ChromoPainter,  $f_4$ -statistics, and admixture graph analyses  
15 (Figures 2, 4-5; Supplementary Figures 13 and 15) all suggest South Asian related ancestry in the Mon,  
16 SouthernThai\_AN, SouthernThai\_TK, CentralThai, and Thai-HO. To further analyse the details of this  
17 putative admixture, we used the GLOBETROTTER software (Hellenthal et al., 2014), based on the  
18 output of ChromoPainter, to infer the number of admixture events, identify proxies for the admixture  
19 sources, and date admixture events. Again, to reduce redundancy in the modelling, we did not include  
20 the Thai-HO in the graph as their ethnolinguistic background is unclear and their genetic profile is very  
21 similar to C\_TK (Supplementary Figure 10E; Supplementary Table 3). We included Yuan in the source  
22 estimation as a control because they did not show any SA-related admixture signal but are  
23 geographically close to the other groups. For each group (including the Yuan control group), a single  
24 admixture event is inferred (Figure 6A). However, the admixture inferred for the Yuan is statistically  
25 uncertain, and the composition of sources is quite different compared to the sources inferred for the  
26 other groups: the dominant major sources are 46% from AA-speaking Kinh and 35% from TK-speaking  
27 Dai while the dominant minor sources are 4% from Indian Gujarati and 2% from ST-speaking Naxi.  
28 For the other groups, the dominant proxy for the major source is the Kinh, ranging from 45% to 63%  
29 (and 7-11% for the Dai), with the minor source from the Indian Brahmin Tiwari (10%) for the  
30 SouthernThai\_TK and Gujarati (7-18%) for the rest. Apart from the dominant sources, the  
31 SouthernThai\_AN are also inferred to have more AN-related (Mamanwa, Borneo, Semende, Atayal,  
32 and Ami) ancestry (19% vs. 9% in SouthernThai\_TK and below 5% in the others), while the Mon have  
33 more ST-related (Lahu, Naxi, and Yi) ancestry (9% vs. below 4% in the others), in agreement with the  
34 admixture graphs (Figure 5).

1           We next estimated the admixture dates using GLOBETROTTER; these range between 600-900  
2 ya for the SA-related populations with the dates for both southern Thai populations tending to be older  
3 than those for the other groups (Figure 6B). We also estimated the admixture date for the Yuan even  
4 though the admixture is uncertain; a much younger date was inferred (~400 ya). We also used another  
5 admixture dating software, ALDER, that is based on the decay of linkage disequilibrium (LD)  
6 (Supplementary Figure 17), which gave results overall falling in the similar time range with a slightly  
7 younger distribution of dates (500-750 ya). We used the most dominant major (Kinh) and minor  
8 (Gujarati) sources inferred by GLOBETROTTER as sources for ALDER. However, the LD decay  
9 curves of all the groups could not be fitted with the Kinh LD curve, while the Gujarati LD curve  
10 provided a fit for the SA-related groups but not for the Yuan. The ALDER dating was therefore carried  
11 out using just the Gujarati LD curve.

12           Finally, we also built an admixture graph for the Thai groups with inferred SA-related ancestry  
13 (Figure 6C). We included for comparison French (as the outgroup), N\_Indian, and Onge to investigate  
14 if the SA-related source is most similar to European, northern Indian, or southern Indian ancestries, and  
15 we also included Atayal as a source of East Asian ancestry. An acceptable graph (worst-fitting  $Z = -$   
16  $1.646$ ) indicates that the SA-related ancestry traces back to a single ancestral node (the star node in  
17 Figure 6C) that contributes 30% to the ancestry of the SA-related Thai groups, which is similar to the  
18 amount of SA-related source (minor source) estimated from GLOBETROTTER (Figure 6A). The  
19 C\_TK are inferred to have an additional 22% ancestry from a lineage related to Atayal, similar to other  
20 admixture graphs for TK groups (Figure 5A, Supplementary Figure 16). Inclusion of more EA source  
21 populations and using Mbuti as an outgroup does not provide an acceptable graph (worst-fitting  $Z = -$   
22  $4.110$ ; Supplementary Figure 18) but the overall topology is consistent with that in Figure 6C. While  
23 an AA-related ancestor contributes more than 80% ancestry to the SA-related Thai groups, suggesting  
24 that they are all mainly AA-related despite some of them speaking TK or AN languages, additional  
25 ancestry comes from TK, N\_Indian, and Onge sources.

26

## 27 **Discussion**

28           Previous detailed genetic studies of Thai/Lao populations focused primarily on uni-parentally  
29 inherited markers and found: contrasting patterns of paternal vs. maternal genetic variation in hill tribe  
30 and hunter-gatherer groups (Oota et al., 2001; Besaggio et al., 2007; Kutanan et al., 2018a and b;  
31 Kutanan et al., 2019); more ancient lineages and heterogeneity of the AA-speaking groups (Kutanan et  
32 al., 2017); genetic relatedness between central Thais and AA-speaking Mon with both showing South  
33 Asian specific haplogroups (Kutanan et al., 2018b; Kutanan et al., 2019); and relatedness between TK  
34 and AN speaking groups (Kutanan et al., 2018b) that is also supported by a recent ancient DNA study  
35 (Yang et al., 2020). However, additional insights into the genetic history of this region, e.g. fine-scale

1 structure, the extent and dating of South Asian admixture, and other population interactions have not  
2 been investigated. Here, we analyzed genome-wide SNP data from 36 populations encompassing all  
3 five major linguistic families from Thailand and Laos. Our major findings, which we discuss below,  
4 are: genetic clustering and heterogeneity of AA speaking groups; the genetic structure of the hill tribes;  
5 differences among the four major TK speaking groups according to geographic region; and South Asian  
6 admixture.

7

### 8 ***Genetic heterogeneity of Austroasiatic speaking populations in Thailand***

9 AA speakers (comprising ~102 million people speaking 167 languages) are widespread across  
10 Asia, from South Asia (Bangladesh and India) to southern China and MSEA (Eberhard, Simons and  
11 Fennig 2020). Although there were two competing hypotheses of AA origins that are related to rice  
12 cultivation, i.e. South vs. Southeast Asian origins (Chaubey et al., 2011; Diffloth 2005), the latter is  
13 supported by genetic evidence (Chaubey et al., 2011). The AA people in SEA are most likely related to  
14 farmers who knew rice and millet cultivation and moved from their homeland, probably located near  
15 the Yangtze River, to the coast and then down the rivers of mainland China to SEA ~4 kya (Weber et  
16 al., 2010; van Driem, 2017; Lipson et al., 2018; McColl et al., 2018). However, prior to the movement  
17 of prehistoric AA-related groups southward, present-day MSEA (both upland and lowland) was home  
18 to hunter-gatherers whose descendants are genetically related to groups in southern Thailand and west  
19 Malaysia, such as the Maniq and Jehai (Jinam et al., 2012). The Neolithic farmer expansion did not  
20 completely replace the hunter-gatherers but admixed with some of them, as reflected by both ancient  
21 and modern DNA studies (Lipson et al., 2018; McColl et al., 2018; Kutanan et al., 2017; Liu et al.,  
22 2020).

23 Previous genetic and linguistic evidence suggested heterogeneity of the Thai AA people (Xu et  
24 al., 2010; Kampuansai et al., 2017; Kutanan et al., 2017; Eberhard, Simons and Fennig, 2020) but  
25 further genetic groupings have not yet been investigated. In this study, several lines of evidence indicate  
26 that the Thai AA speaking populations fall into 3 primary groups: Monic\_AA, Khmu\_Katu\_AA and  
27 Palaungic\_AA (Figures 2-4; Supplementary Figure 12). The language of Mon is in the Monic branch,  
28 the sister clade of Aslian and Nicobarese, while the linguistic branch of Khmu\_Katu\_AA groups are  
29 Khmuic for HtinMal, HtinPray, Mlabri and Khmu, and Katuic for Soa and Bru; the Palaungic branch  
30 includes languages of the Lawa\_Eastern, Lawa\_Western, Palaung and Blang. In contrast to linguistic  
31 studies placing Khmuic and Palaungic languages in the same clade (Diffloth, 2005), we find a closer  
32 relationship between populations who speak Khmuic and Katuic, which might be explained by the  
33 concept of center of gravity (Blench, 2015). This idea proposes that after the Neolithic expansion of  
34 AA ancestors from southern China to MSEA, early AA speakers were concentrated along the middle  
35 Mekong in present-day northern Laos. Some groups subsequently moved westward and were the

1 ancestors of Palaungic and Monic groups, and during this process they came into contact with other  
2 different linguistic groups (e.g. Mon with Burmese ancestors, Lawa\_Eastern and Lawa\_Western with  
3 Karen\_ST, and Palaung with ST groups from NEA), as shown by population structure and relationship  
4 analyses and  $f_4$  tests (Figures 2-4; Supplementary Figure 11; Supplementary Table 3). These different  
5 contact histories would promote subsequent differentiation of the Palaungic and Monic groups from  
6 their Khmuic and Katuic ancestors. Meanwhile, the Khmuic and Katuic ancestors might have moved  
7 up and down the Mekong and had more contact with each other, thus accounting for their closer genetic  
8 relationship with each other. In this region, the Khmuic and Katuic speaking people may have also  
9 interacted with TK groups in Laos and Northeastern Thailand and promoted their genetic affinity  
10 (Figures 2B, 3-4; Supplementary Table 3). However, some differentiation between the Khmuic and  
11 Katuic groups can be seen in the haplotype sharing (Figure 4) and ADMIXTURE results for  $K=10$   
12 (Supplementary Figure 5). Additional studies of AA groups from Thailand, e.g. Pearic and Khmer  
13 speaking groups and other MSEA countries are needed to provide more insights into the genetic  
14 structure of AA-speaking people.

15

### 16 ***The hill tribes***

17 Consisting of ~700,000 people, there are nine officially recognized hill tribes in Thailand: the  
18 AA-speaking Lawa (Lawa\_Eastern and Lawa\_Western), Htin (HtinMal and HtinPray) and Khmu; the  
19 HM-speaking Hmong (HmongNjua and HmongDaw) and IuMien; and the ST-speaking Karen  
20 (KarenPwo, KarenPadaung, and KarenSkaw), Lahu, Lisu and Akha (Schliesinger, 2000, 2001; Penth  
21 and Forbes, 2004). Living in a remote and isolated region of Thailand, the hill tribes are of interest for  
22 their cultural variation in residence pattern after marriage, i.e. patrilocality vs. matrilocality (Oota et al.,  
23 2001; Besaggio et al., 2007; Kutanan et al., 2019, 2020).

24 Most of the hill tribes are isolated from the lowlanders and from each other, which enhances  
25 genetic drift and inbreeding, as found in previous studies of autosomal STR (Kampuansai et al., 2017)  
26 and mtDNA and MSY variation (Kutanan et al., 2020). We therefore expected similar indications of  
27 isolation in our study, which included eight of the official hill tribes (all but the Akha). Indeed, we found  
28 four groups with their own ancestry components in the ADMIXTURE results at  $K = 10$  (Supplementary  
29 Figure 5): Lahu (light green), Karen\_ST (grey), Htin (Mal and Pray) and Khmu (mint) and Hmong\_HM  
30 (peach), in agreement with their higher IBD sharing within groups (Supplementary Figure 7). In  
31 contrast, the Lawa (Eastern and Western), Lisu and IuMien do not stand out in the ADMIXTURE  
32 analysis, and they have relatively less within group IBD sharing (Supplementary Figure 7), show excess  
33 allelic sharing with many other populations in the  $f_4$  results (Supplementary Tables 2-3), and shared  
34 haplotypes with other groups (Figure 4A; Supplementary Figure 6). These results indicate that not all  
35 hill tribes can be characterized simply by high degrees of isolation and genetic drift; the Lawa, Lisu,



1 and IuMien instead seem to have had more interactions with other groups, and so we will focus further  
2 discussion on these three hill tribes. The Lawa (Eastern and Western) are the native groups of northern  
3 Thailand and inhabited lowland areas before some of them moved to the highlands (Lawa\_Western)  
4 while others remained in the lowlands or mid-lands (Lawa\_Eastern) (Nahhas, 2007). By contrast, the  
5 Karen in Thailand are refugees who claim to be the first settlers in Myanmar before the arrival of Mon  
6 and Burmese people, and moved from Myanmar beginning around 1750 A.D. due to the growing  
7 influence of the Burmese (Kuroiwa and Verkuyten, 2008; Gravers, 2012). The Lawa share ancestry  
8 with the Karen\_ST (Figure 4; Supplementary Figure 5), in agreement with previous findings of shared  
9 MSY haplotypes (Kutanan et al., 2020). Genetic relatedness between Karen and Lawa groups was also  
10 reported in a previous genome wide study (Xu et al., 2010). In northern Thailand, Lawa and Karen had  
11 been historically contacted since ~ the 13<sup>th</sup> century A.D. during the Lanna Period (Lewis and Lewis,  
12 1984). Because the languages of AA-speaking Lawa and ST-speaking Karen are different, geographic  
13 proximity along the border between northern/northwestern Thailand and Myanmar is the most likely  
14 factor that promoted admixture between these groups.

15 The Lisu and the Lahu are originally from southern China, and speak closely related languages  
16 that belong to the Loloish branch of ST (Bradley, 1997). Shared genetic ancestry between Lisu and  
17 Lahu is evident in the haplotype sharing and admixture graph results (Figure 4 and 5F; Supplementary  
18 Figure 15), although there are differences: Lisu have mixed ancestries probably due to Sinicization in  
19 southern China before movement to Thailand (Schliesinger, 2000) or interactions with northern Thai  
20 lowlanders after settlement in Thailand (Penth and Forbes, 2004), while the Lahu are more isolated, e.g.  
21 the ADMIXTURE result for  $K = 7$  (Supplementary Figure 5) and the IBD sharing results  
22 (Supplementary Figure 7), in agreement with a previous study of uniparental markers (Kutanan et al.,  
23 2020). There is strong ancestry sharing between the Thai Lahu and Chinese Lahu (Figures 3-4), and the  
24 Chinese Lahu are moreover genetically similar to Vietnamese Lahu (Liu et al., 2020), indicating a close  
25 relationship among Lahu from MSEA and China.

26 Although the IuMien and Hmong are descended from proto-HM groups from central and  
27 southern China (Wen et al., 2005) and are linguistically related, they behave differently in many  
28 analyses (Figures 3-5 Supplementary Figures 6 and 12). The Hmong show genetic signatures of  
29 isolation, such as higher IBD sharing within groups (Supplementary Figure 7), in agreement with a  
30 previous study of uniparental markers (Kutanan et al., 2020), whereas the IuMien show affinities not  
31 only with the Hmong, but also with TK speaking groups and ST speaking Lahu from both Thailand and  
32 China (Figure 4). The differential affinities of HM groups to TK and ST groups has also been shown in  
33 two recent genome-wide studies (Liu et al, 2020; Xia et al., 2019). In addition, the sharing of features  
34 between IuMien (but not Hmong\_HM) and Sinitic languages (Blench, 2008) indicates that IuMien  
35 similarities with other East Asian populations is evident both genetically and linguistically. The higher  
36 genetic isolation of the Hmong could reflect cultural isolation arising from a strong preference for

1 marriage within Hmong groups, while the lower genetic isolation of the IuMien could reflect the  
2 pronounced IuMien cultural preference for adoption (Schliesinger, 2000; Jonsson, 2005; Besaggio et  
3 al., 2007).

4         Though the Mlabri are not officially regarded as a hill tribe, this minority group lives in the  
5 mountainous area and is of interest due to their unique hunting-gathering life style, enigmatic origin,  
6 and very small census size (~400 individuals) (Eberhard, Simons and Fennig, 2020). The Mlabri  
7 language belongs to the Khmuic branch of AA languages that is also spoken by their neighbors, Htin  
8 (Mal and Pray subgroups) and Khmu, suggesting shared common ancestry, and oral tradition indicates  
9 that the Htin are the ancestors of the Mlabri (Oota et al., 2005). A previous genome-wide study also  
10 supported genetic affinities between the Mlabri and the HtinMal (Xu et al., 2010), while uniparental  
11 studies show different affinities. One the paternal side (MSY), Mlabri HtinMal, HtinPray and Khmu  
12 show genetic relationships, consistent with the oral tradition, while on the maternal side (mtDNA)  
13 Mlabri shows genetic relationships with the Katuic-speaking Soa and Bru from northeastern Thailand  
14 (Kutanan et al., 2018a). Our present results also support genetic relatedness among Mlabri, Htin (Mal  
15 and Pray), Khmu, Soa and Bru within the Khmu\_Katu\_AA group (Figure 2B; Supplementary Figures  
16 5-6). The Mlabri, Htin, Khmu, Soa and Bru all migrated from Laos about 100-200 years ago  
17 (Schliesinger, 2000), thus close relatedness among them might reflect gene flow among various groups  
18 in Laos before their independent migrations to Thailand. However, the Mlabri stand out among these  
19 groups in exhibiting extremely high levels of within-group IBD sharing (Supplementary Figure 7),  
20 indicating strong genetic drift and isolation, consistent with previous investigations of mtDNA, Y  
21 chromosome, and autosomal diversity (Oota et al., 2005; Xu et al., 2010; Kutanan et al., 2018a).  
22 Moreover, the IBDNe software failed to estimate the population size, probably also due to their  
23 extremely high within-group IBD sharing. Both the small census size and recent origin within the past  
24 1000 years (Oota et al., 2005; Kutanan et al., 2010), combined with geographic isolation, could account  
25 for the very low genetic diversity of this group.

26

### 27 ***Regional variation of Tai-Kadai speaking populations***

28         With an origin from south/southeastern China (Sun et al., 2013; Pittayaporn, 2014), the TK  
29 language family comprises around 95 languages spoken by ~80 million people in northeast India,  
30 southern China, Vietnam, Myanmar, Cambodia, Thailand and Laos (Eberhard, Simons and Fennig  
31 2020). The TK languages spread to MSEA around 1-2 kya (Pittayaporn, 2014), and previous genetic  
32 studies estimated an expansion time for TK groups ~2 kya (Kutanan et al., 2019) and found relatedness  
33 between modern TK populations and ancient Iron Age samples (McColl et al, 2018). MtDNA and MSY  
34 data indicate contrasting genetic variation and genetic differences between major TK groups in the  
35 North, Northeast and Central regions of Thailand (Kutanan et al., 2019), suggesting different migration  
36 routes of TK groups expanded from China. A previous genome-wide study also reported substructure

1 of Thais in each region (Wangkumhang, 2013), however, these previous studies did not investigate this  
2 substructure in detail. In this study, although there is genetic homogeneity of TK groups compared with  
3 groups speaking other languages (i.e. AA and ST languages), and allelic sharing among N\_TK and  
4 NE\_TK groups (Supplementary Figures 10-11; Supplementary Tables 2-3), overall we find fine  
5 structure of TK groups in each geographic region (Figures 2B, 3-4; Supplementary Figures 5-6) that  
6 primarily reflects heterogeneity in admixture with local AA groups and geographic proximity. Northern  
7 Thailand is close to southern China; the N\_TK groups are genetically close to the southern Chinese Dai  
8 and less mixed with local AA in the region. In contrast, Northeastern Thailand shares a border to Laos;  
9 the NE\_TK groups are more related to the Khmu\_Katu\_AA groups that are widely distributed in Laos  
10 and recently migrated to Thailand. Central and southern Thailand share a border with Myanmar to the  
11 west; the central Thais (C\_TK) and southern Thais (S\_TK) have close genetic relationships with the  
12 Mon, who migrated from Myanmar.

13 Additionally, the N\_TK groups are genetically closer to the clade of TK-speaking Dai and AN-  
14 speaking Atayal in the admixture graph (Supplementary Figure 16). This supports a common origin of  
15 TK and AN language families in southern China, as suggested previously based on linguistic and  
16 genetic evidence (Thurgood, 1994; Sagart, 2004; Kutanan et al., 2018b; Yang et al., 2020), as well as less  
17 contact of the N\_TK groups after their split from the TK-AN source from southern China. Overall, our  
18 results indicate diversity of Thai TK populations, and so future whole genome or genome-wide studies  
19 should include a geographically-representative sample of Thai TK groups, to fully capture this diversity.  
20 In addition, our results provide insights into the relationships of the Thai-HO group, which was  
21 published earlier but without any details concerning the ethnolinguistic background (Lazaridis et al.,  
22 2014). Our results show that the Thai-HO group is quite similar to the CentralThai TK group (Figures  
23 2-4; Supplementary Figure 10E; Supplementary Table 2), thus providing additional context for this  
24 group.

25

## 26 ***South Asian Admixture***

27 The South Asian (SA)-like signal in C\_TK and S\_TK groups is also one of the facilitating  
28 factors that enhance their differentiation from N\_TK and NE\_TK groups (Figures 2-4; Supplementary  
29 Figure 13). SA-related ancestry is also detected in the Mon and SouthernThai\_AN (Figures 2-4;  
30 Supplementary Figure 13). SA admixture analyses indicated that the SA contribution to all Indian-  
31 related Thai groups is as a minor source (~25%) while the main contribution comes from AA-related  
32 sources (Figure 6A). Although the CentralThai and SouthernThai\_TK speak TK languages, and  
33 SouthernThai\_AN speak an AN language, their genetic backgrounds are similar to AA groups (Figures  
34 5B and 6A; Supplementary Figure 18), suggesting cultural diffusion to or admixture with AA groups.  
35 For the CentralThai, our previous mtDNA results showed admixture between Mon and CentralThai

1 people, while the MSY results showed that the CentralThai were influenced by cultural diffusion from  
2 the Mon (Kutanan et al., 2018b, 2019). The SouthernThai\_TK are genetically related to both the Mon  
3 and CentralThai (Figures 2 and 6C; Supplementary Figures 5, 16, and 18), consistent with historical  
4 evidence indicating that there were movements from the central region to the south during the Ayutthaya  
5 Period (during 1350-1767 A.D.) (Baker and Phongpaichit, 2017). Also living in the southern region,  
6 the SouthernThai\_AN not only has SA-related ancestry, but it is also genetically distinct from AN-  
7 speaking groups from Taiwan (Ami and Atayal) and ISEA (Figure 2; Supplementary Figure 16). Similar  
8 to other SA-related groups, the SouthernThai\_AN are more related to AA-speaking Cambodian and  
9 Khmu\_Katu\_AA groups in the PCA (Figure 2) and in the qpGraph received ancestry from a N\_Indian  
10 ancestor (~27%) and an admixed ancestor with Cambodian (~90%) and Atayal (10%) ancestry (Figure  
11 5B). This pattern is in agreement with the AN groups from Vietnam (Liu et al., 2020); our results  
12 support the MSEA origin of the SouthernThai\_AN group, via cultural diffusion involving local AA  
13 groups.

14 There is archaeological evidence of frequent early prehistorical contacts between India and  
15 present-day Thailand (and Cambodia) during the Iron Age that brought exotic goods as well as ideas  
16 rooted in Buddhist and Hindu religions (Higham and Thodsarat, 2012). This could result in some Indian  
17 admixture in the local AA groups who then subsequently changed languages as a result of admixture or  
18 cultural diffusion involving arriving TK/AN groups. However, the dating of the Indian admixture in the  
19 Thai groups is more recent, ~500-750 ya (Figure 6B; Supplementary Figure 17), which fits with the  
20 Ayutthaya Period (Baker and Phongpaichit, 2017). During the 16<sup>th</sup> to 17<sup>th</sup> century A.D., Siam (the  
21 former name for what is now the kingdom of Thailand) had maritime connections with westward trade  
22 dominated by Persians, Indians, Chinese and other nationalities who sailed from various Indian ports  
23 via the Melaka Straits or passed via Burmese ports to Ayutthaya (Baker and Phongpaichit, 2017;  
24 Ruangsilp and Wibulsilp, 2017). Trading and political connections – Indian Muslims served in  
25 administration (Chularatana, 2007) – would have facilitated admixture from South Asian to central Thai  
26 people (probably related to the Mon) during the Ayutthaya Period. As mentioned previously, this is also  
27 the time period of historical movements from the central region to the south, which could immediately  
28 bring the SA admixture to southern Thais (TK and AN). Alternatively, many ports in southern Thailand  
29 were also part of the international trade network, so the South Asian admixture in the southern Thais  
30 (TK and AN) probably also reflects this process. Europeans, e.g. Portuguese, were also an important  
31 part of this transnational network (Baker and Phongpaichit, 2017), but our results do not indicate any  
32 European genetic influence (Figures 2C and 6C; Supplementary Figure 5). Finally, a single-pulse  
33 admixture is inferred by GLOBETROTTER, which is supported by the admixture graph (Figure 6C;  
34 Supplementary Figure 18). Although this suggests that we have found a strong SA admixture signal  
35 from AA genetically related groups during the Ayutthaya Period, we cannot rule out the possibility of  
36 extensive and continuous interaction between South Asian and Mainland Southeast Asian in the past.

1 More ancient DNA data from this region could provide further insights into this SA-MSEA interaction  
2 as well as the historical relationships among AA, TK, and AN groups in MSEA.

## 3 4 **Conclusions**

5 We generated and analysed an extensive and intensive genome-wide SNP dataset from 36  
6 ethnolinguistic groups from Thailand and Laos encompassing all five language families in MSEA, i.e.  
7 TK, AA, ST, HM and AN languages. We observed fine-scale genetic structure within each language  
8 family; interactions between AA and TK speakers are the principal factor influencing the population  
9 structure of the major TK speaking groups in each region. Interactions with South Asians also is evident  
10 in the genetic profiles of the Monic\_AA, Central and Southern TK, and SouthernThai\_AN groups. We  
11 also find genetic differences among ethnolinguistic groups within the ST and HM families, as well as  
12 among the hill tribes, that reflect different levels of contact with other groups. We observed genetic  
13 differentiation of the Thai and Taiwanese AN groups; genetic interactions between AN and AA groups  
14 in Thailand probably reflect cultural diffusion. Although our analyses provide the first detailed insights  
15 into the genetic history of Thai/Lao groups, further studies that include diverse modern groups from  
16 other MSEA countries, and more ancient samples, will provide even more insights into the demographic  
17 history of MSEA. In 2019, the Genomics Thailand Initiative was launched by the Thai government,  
18 with the goal of sequencing the genomes of 50,000 Thai people to enable precision medicine, and the  
19 project is ongoing. Our insights into the genetic structure of Thai/Lao ethnolinguistic groups should  
20 prove beneficial for selecting populations to include in such whole genome sequence and other  
21 biomedical studies.

22

## 23 **Material and Methods**

### 24 *Sample preparation and quality control*

25 Genomic DNA samples were from our previous studies (Kutanan et al., 2017; 2018; 2019)  
26 (Figure 1), with the exception of newly-collected samples from southern Thailand (SouthernThai\_TK  
27 and SouthernThai\_AN). In our previous studies, we interviewed all potential donors to screen for  
28 volunteers unrelated for at least two generations. We then collected blood, buccal or saliva samples  
29 with informed consent, which specified that their biological samples will also be stored for further  
30 anthropological genetic studies. For the present study, we used the same criteria as in the previous  
31 studies to recruit prospective donors from southern Thailand. Buccal samples were collected with  
32 written informed consent, and we extracted DNA using the Genra Puregene Buccal Cell Kit (Qiagen,  
33 Germany) according to the manufacturer's directions. Ethical approval for this study was granted by  
34 Khon Kaen University and by the Ethics Commission of the University of Leipzig Medical Faculty.

1 Genotyping was carried out using the Affymetrix Axiom Genome-Wide Human Origins array  
2 (Patterson et al., 2012); primary screening with the Affymetrix Genotyping Console v4.2 resulted in a  
3 total of 463 samples (genotype call rate  $\geq 97\%$ ) genotyped for 596,085 loci on the hg19 version of the  
4 human reference genome coordinates.

5 We used PLINK version 1.90b5.2 (Purcell et al., 2007) to exclude loci and individuals with  
6 more than 5% missing data and also exclude mtDNA and sex chromosome loci. We further excluded  
7 loci which did not pass the Hardy-Weinberg equilibrium test ( $p$  value less than 0.00005), or had more  
8 than 50% missing data, within any population. We checked individual relatedness using KING  
9 (Manichaikul et al., 2010) implemented in PLINK version 2.0 ([https://www.cog-  
11 genomics.org/plink/2.0/](https://www.cog-<br/>10 genomics.org/plink/2.0/)) and excluded one individual from each pair of individuals with 1<sup>st</sup> degree  
12 kinship. There are in total 452 Thai/Lao individuals with 533,705 loci after these quality control  
measures (Supplementary Table 1).

13 We merged our data with data generated using the same array from modern populations from  
14 South Asia, East Asia and outgroup populations (the African Mbuti and European French) (Reich et al.,  
15 2011; Patterson et al., 2012; Lazaridis et al., 2014; Qin and Stoneking, 2015; Lipson et al., 2018) using  
16 mergeit in EIGENSOFT version 7.2.1 with default settings (Patterson et al., 2006). The data on ancient  
17 samples from previous studies (Lipson et al., 2018; McColl et al., 2018) were retrieved with all  
18 information included and their alleles were obtained through pseudo-haploid strategies. We excluded  
19 ancient samples with less than 15,000 informative loci; the number of loci after data merging is 370,732.

## 20 ***Population structure analyses***

21 For population structure analyses, PLINK version 1.90b5.2 was used to perform pruning for  
22 linkage disequilibrium, excluding one variant from pairs with  $r^2 > 0.4$  within windows of 200 variants  
23 and a step size of 25 variants, leaving in total 158,772 loci (153,191 loci when Mbuti and French are  
24 excluded). The Principle Component Analysis (PCA) was performed using smartpca from  
25 EIGENSOFT with the “lsqproject” and “autoshrink” options, with Mbuti and French excluded to focus  
26 on the structure among Asians. Three samples were identified as outliers based on the first 4 PCs and  
27 were removed (Supplementary Figure 2). The heatmap of additional PCs was visualized using the  
28 pheatmap package in R version 3.6.0. The clustering program ADMIXTURE version 1.3.0 (Alexander  
29 et al., 2009) was run from  $K = 2$  to  $K = 15$  with 100 replicates for each  $K$  and with random seeds with  
30 the -P option. The ancient samples and highly drifted modern populations (Onge, Mlabri, and  
31 Mamanwa) were projected in the PCA and ADMIXTURE analyses. PONG version 1.4.7 (Behr et al.,  
32 2016) was used to visualize the top 20 highest likelihood ADMIXTURE replicates for the major mode  
33 at each  $K$ .

1

## 2 *Allele sharing analyses*

3 To test admixture and excess ancestry sharing, we computed  $f_3$  and  $f_4$ -statistics from  
4 ADMIXTOOLS version 5.1 (Patterson et al., 2012) using admixr version 0.7.1 (Petr et al., 2019), with  
5 significance assessed through block jackknife resampling across the genome and using Mbuti as the  
6 outgroup. Additional  $f_4$ -statistics were computed using French as the outgroup to avoid deep attraction  
7 to Africans if ancient samples were involved, and only transversions (3,090-53,870 SNPs depending on  
8 the quality of samples) were used to avoid potential noise from ancient DNA damage patterns. The  
9 heatmap visualization of  $f_3$  profiles was obtained using the pheatmap package in R.

10

## 11 *Data phasing and haplotype sharing analyses*

12 To analyse haplotype sharing, we begin with data phasing; SHAPEIT version 4.1.3 (Delaneau  
13 et al., 2019) was used to phase the modern samples, with East Asian (without the Kinh Vietnamese  
14 merged in our dataset) and South Asian populations as a reference panel, and the recombination map  
15 from the 1000 Genomes Phase3 (Genomes Project et al., 2015). To prepare the reference panel, we  
16 extracted the East and South Asian individuals as well as the overlapping sites with our data for each  
17 chromosome from the 1000 Genomes Phase3 data using bcftools version 1.4  
18 (<http://samtools.github.io/bcftools/>). The phasing accuracy of SHAPEIT4 can be enhanced by  
19 increasing the number of conditioning neighbors in the Positional Burrows–Wheeler Transform  
20 (PBWT) on which haplotype estimation is based (Delaneau et al., 2019). We ran phasing with the  
21 options --pbwt-depth 8 for 8 conditioning neighbors and left other parameters as default.

22 We then ran ChromoPainter version 2 (Lawson et al., 2012) on the phased data set to begin the  
23 haplotype sharing investigation, with sample sizes for each population randomly down-sampled to 4  
24 and 8. The former was used for 10 iterations of the EM (expectation maximization) process to estimate  
25 the switch rate and global mutation probability, while the latter was for the chromosomal painting  
26 process with the estimated switch and global mutation rates, which then gave the output for downstream  
27 analyses. We first attempted to paint the chromosomes of each individual, using all of the modern Asian  
28 samples as both donors and recipients via the -a argument. The EM estimation of switch rate and global  
29 mutation probability were  $\sim 623.09$  and  $\sim 0.0013$ , respectively, which were then used as the starting  
30 values for these parameters for all donors in the painting process. To minimize the effect of genetic drift  
31 in the Thai/Lao groups, we also performed another run using all the modern Asian samples except for  
32 those sampled in this study as both donors and recipients; samples from this study were used only as  
33 recipients. The EM estimation of switch rate and global mutation probability for this analysis were  
34  $\sim 764.56$  and  $\sim 0.0011$ , respectively. The heatmap results were generated using the pheatmap package in  
35 R.

1 To identify shared IBD blocks between each pair of individuals and homozygous-by-descent  
2 (HBD) blocks within each individual, we used refinedIBD (Browning and Browning, 2013). Both  
3 identified IBD and HBD blocks are considered as IBD blocks in our analyses, which is analogous to  
4 pairwise shared coalescence (PSC) segments in a previous study (Al-Asadi et al., 2019). The IBD blocks  
5 within a 0.6 cM gap were merged using the program merge-ibd-segments from BEAGLE utilities  
6 (Browning and Browning, 2007; Browning et al., 2018), allowing only 1 inconsistent genotype between  
7 the gap and block regions. These results were used to generate four datasets based on the identified IBD  
8 blocks lengths: 1 to 5 cM, 5 to 10 cM, over 10 cM, and at least 2 cM. We used the first three datasets  
9 for analysis of the IBD sharing between populations by network visualization in different time periods  
10 (Ralph and Coop, 2013; Al-Asadi et al., 2019), while the last one was used to analyse overall IBD  
11 sharing between populations by heatmap and IBD sharing within each individual population (Browning  
12 and Browning, 2015; Browning et al., 2018). In each dataset, we summed up the total number and  
13 length of IBD blocks for each individual pair and calculated the population median and mean. The pairs  
14 with at least 10 cM average summed length (4 cM for the range of 1 to 5 cM) of shared blocks were  
15 kept to reduce noise and false positives in network visualization. The IBDNe software (Browning and  
16 Browning, 2015; Browning et al., 2018) was employed to estimate effective population size changes  
17 over time with the following conditions as suggested previously (Browning and Browning, 2015):  
18 shared blocks of at least 2cM within each population, and estimated population size numbers inferred  
19 within the past 50 generations only, as previously suggested for SNP array data (Browning and  
20 Browning, 2015). A generation time of 30 years (Fenner, 2005) was used to convert generations to  
21 years.

22

### 23 *Admixture source and date inferences*

24 For the populations with apparent Indian admixture, we ran GLOBETROTTER (Hellenthal et  
25 al., 2014) using the ChromoPainter results with only Thai/Lao samples in this study as recipients and  
26 all the donors as surrogates. We first tested the certainty and potential waves of admixture events, and  
27 then estimated the major and minor sources as well as the dates of admixture. The distributions of  
28 admixture dates were assessed through 100 bootstraps. We also dated admixture events with ALDER  
29 (Loh et al., 2013) using the populations identified as the major (Kinh) and minor (Gujarati) sources in  
30 the GLOBETROTTER analysis as the two sources used to date the admixture in the ALDER analysis.  
31 However, we could not get an acceptable fit of the LD decay curves between Kinh and all the tested  
32 groups, so we present the dates inferred using Gujarati as a single source instead. Again, genetic map  
33 information was retrieved from 1000 Genomes Phase3 data (Genomes Project et al., 2015).

34

### 35 *Admixture graph analyses*



1 Using the pruned dataset (18,310 SNPs) of the Thai/Lao and other reference modern  
2 populations (based on ChromoPainter results) and ancient samples (with more than 130,000  
3 overlapping SNPs, corresponding to < 65% missing data), TreeMix version 1.12 (Pickrell and Pritchard,  
4 2012) was used to construct a maximum-likelihood tree in order to reveal population relationships and  
5 migration among five ancient samples (Ho-PhaFaen, N-GuaChacCave, N-TamPaLing, IA-  
6 LongLongRak and Hi-Kinabatagan), Thai/Lao modern populations, and selected reference modern  
7 populations, i.e. the African Mbuti (used as outgroup), European French, Indo-European-speaking  
8 Indian groups (Gujarati, Brahmin Tiwari, and Lodhi), Andamanese Onge, and East Asian groups from  
9 the five different language families (AA-speaking Cambodian, TK-speaking Dai, AN-speaking Atayal,  
10 ST-speaking Naxi and HM-speaking Miao). The Indo-European-speaking Indian groups were together  
11 labelled as N\_Indian as they are enriched for the “North Indian” ancestry component identified  
12 previously, whereas Onge are enriched for “South Indian” ancestry (Reich et al., 2009). Based on  
13 ChromoPainter results, the AA Thai groups were further grouped into Monic\_AA (Mon),  
14 Khmu\_Katu\_AA (HtinMal, HtinPray, Mlabri, Khmu, So, and Bru) and Palaungic\_AA (Lawa\_Eastern,  
15 Lawa\_Western, Palaung, and Blang); the TK Thai/Lao groups were grouped into N\_TK (Khonmueang,  
16 Shan, Khuen, Lue, Phuan, and Yuan), NE\_TK (Black Tai, LaoIsan, Phutai, Nyaw, Kalueang and  
17 Laotian), C\_TK (CentralThai) and S\_TK (SouthernThai\_TK); the HmongNjua and HmongDaw were  
18 grouped into Hmong\_HM; and the KarenPwo, KarenPadaung, and KarenSkaw were grouped into  
19 Karen\_ST. We investigated 0 to 3 migration events using 10 independent runs and then selected the  
20 topology with the highest likelihood for further investigation. To model admixture graphs, we used  
21 AdmixtureBayes (Nielsen, 2018) to estimate the top 10 posterior admixture graphs for Thai/Lao groups  
22 from each language family and comparative modern populations (including the associated linguistic  
23 source groups, N\_Indian group, and outgroup Mbuti), based on the covariance of the allele frequency  
24 profiles. We also performed an additional investigation of the potential South Asian genetic influence  
25 on some Thai groups (Mon, C\_TK, S\_TK, SouthernThai\_AN), including Mbuti, French, N\_Indian,  
26 Onge, and the associated linguistic source groups to disentangle potential East Asian vs. South  
27 Indian/Hoabihian (Onge) vs. North Indian (N\_Indian) vs. European (French) ancestry. Each case study  
28 graph was inferred from an independent pruned dataset with 175,578-191,384 SNPs, depending on the  
29 number of groups/individuals. For each AdmixtureBayes run, a total of 300,000 MCMC steps were  
30 carried out, stopping the run if the summaries of effective sample size were all above 200. Finally, we  
31 used the estimated graphs from AdmixtureBayes as input for qpGraph from ADMIXTOOLS to test the  
32 goodness of fit of the graphs. Acceptable graphs have, by convention, an absolute value of the Z-score  
33 of the worst  $f_4$  statistic less than 3. If none of the estimated graphs from AdmixtureBayes produced an  
34 acceptable graph, we removed populations based on the  $f_4$  outliers output of qpGraph, used the option  
35 “-subnodes” in AdmixtureBayes, and ran qpGraph again. We iterated these procedures until we were

1 able to find an acceptable graph. The qpGraph parameters are as follows: outpop: NULL, blgsize: 0.05,  
2 forcezmode: YES, diag: 0.0001, bigiter: 6, hires: YES, and lambdascale: 1.

#### 4 **Acknowledgements**

5 We thank all sample donors for making this work possible. We acknowledge Khamnikone  
6 Sipaseuth, Saksuriya Triyarach, Narongdech Mahasirikul, Supada Khonyoung and Dusit Boonmekam  
7 for assistance in collecting samples. We thank Roland Schröder for technical assistance. We thank  
8 Sandra Oliveira and Irina Pugach for helpful advice concerning computational analyses. This study was  
9 supported by the Max Planck Society and the Thailand Research Fund (RSA6180058).

#### 11 **Data Availability**

12 Data are made available upon receipt of a signed letter to the corresponding author confirming  
13 that the data will only be used in accordance with the restrictions of the informed consent, including the  
14 following: the data will not be transferred to anyone else; the data will be used for  
15 genetic/anthropological studies but not for any commercial purposes or no attempt to identify any of  
16 the sample donors.

#### 18 **References**

- 19 Al-Asadi H, Petkova D, Stephens M, Novembre J. 2019. Estimating recent migration and population-  
20 size surfaces. *PLoS Genet.* 15:e1007908.
- 21 Alexander DH, Novembre J, Lange K. 2009. Fast model-based estimation of ancestry in unrelated  
22 individuals. *Genome Res.* 19:1655–1664.
- 23 Anderson D.1990. Lang Rong Rien rockshelter: a Pleistocene-early Holocene archaeological site from  
24 Krabi, Southwestern Thailand. Philadelphia: University of Pennsylvania Press.
- 25 Baker C, Phongpaichit P. 2017. A history of Ayutthaya. Cambridge: Cambridge University Press.
- 26 Behr AA, Liu KZ, Liu-Fang G, Nakka P, Ramachandran S. 2016. Pong: Fast analysis and visualization  
27 of latent clusters in population genetic data. *Bioinformatics* 32:2817-2823.
- 28 Besaggio D, Fuselli S, Srikumool M, Kampuansai J, Castri L, Tyler-Smith C, Seielstad M,  
29 Kangwanpong D, Bertorelle G. 2007. Genetic variation in Northern Thailand Hill Tribes:  
30 origins and relationships with social structure and linguistic differences. *BMC Evol*  
31 *Biol* 7(Suppl 2):S12.
- 32 Bradley D. 1997. Tibeto-Burman languages and classification. In: Bradley D, editor. Papers in South  
33 East Asian linguistics No.14: Tibeto-Burman languages of the Himalayas. Canberra: Pacific  
34 Linguistics. p. 1-72.

- 1 Browning SR, Browning BL. 2007. Rapid and Accurate Haplotype Phasing and Missing-Data Inference  
2 for Whole-Genome Association Studies By Use of Localized Haplotype Clustering. *Am J Hum*  
3 *Genet.* 81:1084–1097.
- 4 Browning BL, Browning SR. 2013. Improving the accuracy and efficiency of identity-by- descent  
5 detection in population data. *Genetics* 194:459–471.
- 6 Browning SR, Browning BL. 2015. Accurate Non-parametric Estimation of Recent Effective  
7 Population Size from Segments of Identity by Descent. *Am J Hum Genet.* 97:404–418.
- 8 Browning SR, Browning BL, Daviglus ML, Durazo-Arvizu RA, Schneiderman N, Kaplan RC, Laurie  
9 CC. 2018. Ancestry-specific recent effective population size in the Americas. *PLoS Genet.*  
10 14:1–22.
- 11 Blench R. 2008. Stratification in the peopling of China: how far does the linguistic evidence match  
12 genetics and archaeology? In: Alicia SM, Blench R, Ross MD, Peiros I, Marie L, editors.  
13 Human migrations in continental East Asia and Taiwan. Matching archaeology, linguistics and  
14 genetics. London: Routledge. p. 105–132.
- 15 Blench R. 2015. Reconstructing Austroasiatic prehistory. In: Sidwell P, Jenny M, editors. Handbook of  
16 Austroasiatic. Canberra: Pacific Linguistics.
- 17 Besaggio D, Fuselli S, Srikumool M, Kampuansai J, Castri L, Tyler-Smith C, Seielstad M,  
18 Kangwanpong D, Bertorelle G. 2007. Genetic variation in Northern Thailand Hill Tribes:  
19 origins and relationships with social structure and linguistic differences. *BMC Evol Biol.*  
20 7(Suppl 2):S12.
- 21 Chaubey G, Metspalu M, Choi Y, Mägi R, Romero IG, Soares P, van Oven M, Behar DM, Rootsi S,  
22 Hudjashov G, et al. 2011. Population genetic structure in Indian Austroasiatic speakers: the role  
23 of landscape barriers and sex-specific admixture. *Mol Biol Evol* 28(2):1013–1024.
- 24 Chularatana J. 2007. Muslim communities during the Ayutthaya Period. *MANUSYA: Journal of*  
25 *Humanities* 10 (1): 89-107.
- 26 Ceballos FC, Joshi PK, Clark DW, Ramsay M, Wilson JF. 2018. Runs of homozygosity: Windows into  
27 population history and trait architecture. *Nat Rev Genet* 19:220–234.
- 28 Delaneau O, Zagury JF, Robinson MR, Marchini JL, Dermitzakis ET. 2019. Accurate, scalable and  
29 integrative haplotype estimation. *Nat Commun* 10, 5436.
- 30 Demeter F, Shackelford LL, Bacon AM, Durringer P, Westaway K, Sayavongkhamdy T, Braga J,  
31 Sichanthongtip P, Khamdalavong P, Ponche JL, et al. 2012. Anatomically modern human in  
32 Southeast Asia (Laos) by 46 ka. *Proc Natl Acad Sci USA* 109(36):14375–14380.
- 33 Diffloth G. 2005. The contribution of linguistic palaeontology to the homeland of Austroasiatic. In:  
34 Sagart L, Blench R, Sanchez-Mazas A, editors. The peopling of East Asia: putting together the  
35 archaeology, linguistics and genetics. London: Routledge Curzon. p. 77–80.  
36

- 1 Eberhard DM, Simons GF, Fennig CD. 2020. *Ethnologue: languages of the World*. 23<sup>rd</sup> edn. Dallas:  
2 SIL International.
- 3 Fenner JN. 2005. Cross-cultural estimation of the human generation interval for use in genetics-based  
4 population divergence studies. *Am J Phys Anthropol* 128:415–423.
- 5 Genomes Project C, Auton A, Brooks LD, Durbin RM, Garrison EP, Kang HM, Korbel JO, Marchini  
6 JL, McCarthy S, McVean GA, et al. 2015. A global reference for human genetic variation.  
7 *Nature* 526:68–74.
- 8 Gravers M. 2012. Waiting for a righteous ruler: the karen royal imaginary in thailand and burma. *J*  
9 *Southeast Asian studies* 43: 340-363.
- 10 Hellenthal G, Busby GBJ, Band G, Wilson JF, Capelli C, Falush D, Myers S. 2014. A genetic atlas of  
11 human admixture history. *Science* 343(6172):747–751.
- 12 Higham C, Thosarat R. 2012. *Early Thailand from prehistory to Sukhothai*. Bangkok: River Books.
- 13 Higham C. 2014. *Early Mainland Southeast Asia: from first humans to Angkor*. Bangkok (Thailand):  
14 River Books Press.
- 15 HUGO Pan-Asian SNP Consortium. 2009. Mapping human genetic diversity in Asia. *Science*  
16 326:1541–1545.
- 17 Jinam TA, Hong LC, Phipps ME, Stoneking M, Ameen M, Edo J; HUGO Pan-Asian SNP Consortium,  
18 Saitou N. 2012. Evolutionary history of continental southeast Asians: “early train” hypothesis  
19 based on genetic analysis of mitochondrial and autosomal DNA data. *Mol Biol Evol* 29:3513–  
20 3527.
- 21 Jonsson H. 2005. *Thailand Mien relations: Mountain people and state control in Thailand*. New York:  
22 Cornell University Press.
- 23 Lawson DJ, Hellenthal G, Myers S, Falush D. 2012. Inference of population structure using dense  
24 haplotype data. *PLoS Genet*. 81:e1002453.
- 25 Lazaridis I, Patterson N, Mittnik A, Renaud G, Mallick S, Kirsanow K, Sudmant PH, Schraiber JG,  
26 Castellano S, Lipson M, et al. 2014. Ancient human genomes suggest three ancestral  
27 populations for present-day Europeans. *Nature* 513:409–413.
- 28 Lewis P, Lewis E. 1984. *Peoples of the Golden Triangle: Six Tribes in Thailand*. London: Thames &  
29 Hudson.
- 30 Lipson M, Cheronet O, Mallick S, Rohland N, Oxenham M, Pietrusewsky M, Pryce TO, Willis A,  
31 Matsumura H, Buckley H, et al. 2018. Ancient genomes document multiple waves of migration  
32 in Southeast Asian prehistory. *Science* 361:92–95.
- 33 Liu D, Duong NT, Ton ND, Phong NV, Pakendorf B, Hai NV, Stoneking M. 2020. Extensive  
34 ethnolinguistic diversity in Vietnam reflects multiple sources of genetic diversity, *Mol Biol*  
35 *Evol*. 37(9):25035–2519.
- 36
- 37 Loh PR, Lipson M, Patterson N, Moorjani P, Pickrell JK, Reich D, Berger B. 2013. Inferring admixture  
38 histories of human populations using linkage disequilibrium. *Genetics* 193(4):1233–1254.
- 39
- 40 Manichaikul A, Mychaleckyj JC, Rich SS, Daly K, Sale M, Chen WM. 2010. Robust relationship  
41 inference in genome-wide association studies. *Bioinformatics* 26(22):2867–2873.

- 1 McColl H, Racimo F, Vinner L, Demeter F, Gakuhari T, Víctor Moreno-Mayar J, Van Driem G,  
2 Wilken UG, Seguin-Orlando A, De la Fuente Castro C, et al. 2018. The prehistoric peopling of  
3 Southeast Asia. *Science* 361:88–92.
- 4 Nahhas, R. W. 2007. Sociolinguistic survey of Lawa in Thailand. Chiang Mai (Thailand): Survey Unit  
5 Department of Linguistics Faculty of Humanities Payap University.
- 6 Nakbunlung S. 1994. Origins and biological affinities of the modern Thai population: an osteological  
7 perspective. [PhD Dissertation]. Illinois, USA: University of Illinois at Urbana-Champaign.
- 8 Nielsen SV. 2018. Inferring gene flow between populations with statistical methods [PhD thesis].  
9 Aarhus, Denmark: Aarhus Universitet.
- 10 Oota H, Settheetham-Ishida W, Tiwawech D, Ishida T, Stoneking M. 2001. Human mtDNA and Y-  
11 chromosome variation is correlated with matrilineal versus patrilineal residence. *Nat Genet*  
12 29(1): 20–21.
- 13 Penth H, Forbes A. 2004. The people of mountaintops. In: Penth H, Forbes A, editors. A brief history  
14 of Lan Na and the peoples of Chiang Mai. Chiang Mai(Thailand): Chiang Mai City Arts and  
15 Cultural Centre Chiang Mai Municipality. p. 247–254.
- 16 Petr M, Vernot B, Kelso J. 2019. admixr—R package for reproducible analyses using ADMIXTOOLS.  
17 *Bioinformatics* 35(17):3194–3192.
- 18 Pickrell JK, Pritchard JK. 2012. Inference of population splits and mixtures from genome-wide allele  
19 frequency data. *PLoS Genet*. 8(11):e1002967.
- 20 Pittayaporn P. 2014. Layers of Chinese loanwords in proto-southwestern Tai as evidence for the dating  
21 of the spread of southwestern Tai. *Manusya J Humanit* 20:47–68.
- 22 Patterson N, Price AL, Reich D. 2006. Population Structure and Eigenanalysis. *PLoS Genet*. 2:e190.
- 23 Patterson N, Moorjani P, Luo Y, Mallick S, Rohland N, Zhan Y, Genschoreck T, Webster T, Reich D.  
24 2012. Ancient admixture in human history. *Genetics* 192:1065–1093.
- 25 Purcell S, Neale B, Todd-Brown K, Thomas L, Ferreira MAR, Bender D, Maller J, Sklar P, de Bakker  
26 PIW, Daly MJ, et al. 2007. PLINK: A Tool Set for Whole-Genome Association and Population-  
27 Based Linkage Analyses. *Am J Hum Genet* 81:559–575.
- 28 Qin P, Stoneking M. 2015. Denisovan Ancestry in East Eurasian and Native American Populations.  
29 *Mol Biol Evol* 32:2665–2674.
- 30 Ralph P, Coop G. 2013. The Geography of Recent Genetic Ancestry across Europe. *PLoS Biol*  
31 11(5):e1001555.
- 32 Reich D, Thangaraj K, Patterson N, Price AL, Singh L. 2009. Reconstructing Indian population  
33 history. *Nature* 461(7263):489–494.
- 34 Reich D, Patterson N, Kircher M, Delfin F, Nandineni MR, Pugach I, Ko AMS, Ko YC, Jinam TA,  
35 Phipps ME, et al. 2011. Denisova admixture and the first modern human dispersals into  
36 Southeast Asia and Oceania. *Am J Hum Genet* 89:516–528.

- 1 Ruangsilp B and Wibulsilp P. 2017. Ayutthaya and the Indian Ocean in the 17th and 18th Centuries:  
2 International Trade, Cosmopolitan Politics, and Transnational Networks. *J Siam Soc* 105: 97-  
3 114.
- 4 Kampuansai J, Völgyi A, Kutanan W, Kangwanpong D, Pamjav H. 2017. Autosomal STR variations  
5 reveal genetic heterogeneity in the Mon-Khmer speaking group of Northern Thailand. *Forensic*  
6 *Sci Int Genet* 27:92–99.
- 7 Kampuansai J, Kutanan W, Dudás E, Vágó-Zalán A, Galambos A, Pamjav H. 2020. Paternal genetic  
8 history of the Yong population in northern Thailand revealed by Y-chromosomal haplotypes  
9 and haplogroups. *Mol Genet Genomics* 295(3):579-589.
- 10 Kuroiwa Y, Verkuyten M. 2008. Narratives and the constitution of a common identity: the karen in  
11 burma. *Identities-Glob Stud* 15: 391-412.
- 12 Kutanan W, Ghirotto S, Bertorelle G, Srithawong S, Srithongdaeng K, Pontham N, Kangwanpong D.  
13 2014. Geography has more influence than language on maternal genetic structure of various  
14 northeastern Thai ethnicities. *J Hum Genet* 59(9):512-20.
- 15 Kutanan W, Kampuansai J, Srikumool M, Kangwanpong D, Ghirotto S, Brunelli A, Stoneking M.  
16 2017. Complete mitochondrial genomes of Thai and Lao populations indicate an ancient origin  
17 of Austroasiatic groups and demic diffusion in the spread of Tai–Kadai languages. *Hum Genet*  
18 136(1):85-98.
- 19 Kutanan W, Kampuansai J, Changmai P, Flegontov P, Schröder R, Macholdt E, Hübner A,  
20 Kangwanpong D, Stoneking M. 2018a. Contrasting maternal and paternal genetic variation of  
21 hunter–gatherer groups in Thailand. *Sci Rep* 8:1536.
- 22 Kutanan W, Kampuansai J, Brunelli A, Ghirotto S, Pittayaporn P, Ruangchai S, Schröder R, Macholdt  
23 E, Srikumool M, Kangwanpong D, et al. 2018b. New insights from Thailand into the maternal  
24 genetic history of Mainland Southeast Asia. *Eur J Hum Genet* 26(6): 898–911.
- 25 Kutanan W, Kampuansai J, Srikumool M, Brunelli A, Ghirotto S, Arias L, Macholdt E, Hübner A,  
26 Schröder R, Stoneking M. 2019. Contrasting Paternal and Maternal Genetic Histories of Thai  
27 and Lao Populations. *Mol Biol Evol* 36(7):1490–1506.
- 28 Kutanan W, Shoocongdej R, Srikumool M, Hübner A, Suttipai T, Srithawong S, Kampuansai J,  
29 Stoneking M. 2020. Cultural variation impacts paternal and maternal genetic lineages of the  
30 Hmong-Mien and Sino-Tibetan groups from Thailand. *Eur J Hum Genet* doi: 10.1038/s41431-  
31 020-0693-x.
- 32 Sagart L. 2004. The higher phylogeny of Austronesian and the position of Tai-Kadai. *Ocean Ling*  
33 43:411–444.
- 34 Sangvichien S. 1966. Neolithic skeleton from Ban Kao, Thailand, and the problem of Thai origins. *Curr*  
35 *Anthropol* 7:234–235.
- 36 Schliesinger J. 2000. Ethnic groups of Thailand: non-Tai-speaking peoples. Bangkok (Thailand): White  
37 Lotus Press.
- 38 Schliesinger J. 2001. Tai Group of Thailand. Bangkok (Thailand): White Lotus Press.
- 39 Severson AL, Carmi S, Rosenberg NA. 2019. The Effect of Consanguinity on Between- Individual  
40 Identity-by-Descent Sharing. *Genetics* 212:305-316.

- 1 Shoocondej R. 2006. Late Pleistocene activities at the Tham Lod rockshelter in highland Bang Mapha,  
2 Mae Hongson Province, Northwestern Thailand. In: Bacus EA, Glover IC, Pigott VC, editors.  
3 Uncovering Southeast Asia's past. Singapore: NUS Press. p. 22–37.
- 4 Sidwell P. 2014. Austroasiatic Classification. In: Jenny M, Sidwell P, editors. The handbook of  
5 Austroasiatic languages. Leiden/Boston: Brill. p. 144–220.
- 6 Srithawong S, Srikumool M, Pittayaporn P, Ghirotto S, Chantawannakul P, Sun J, Eisenberg A,  
7 Chakraborty R, Kutanan W. 2015. Genetic and linguistic correlation of the Kra-Dai-speaking  
8 groups in Thailand. *J Hum Genet* 60:371–380
- 9 Srithawong S, Muisuk K, Srikumool M, Mahasirikul N, Triyarach S, Sriprasert K, Kutanan W. 2020.  
10 Genetic structure of the ethnic Lao groups from mainland Southeast Asia revealed by forensic  
11 microsatellites. *Ann Hum Genet* 84(5):357–369.
- 12 Sun H, Zhou C, Huang X, Lin K, Shi L, Yu L, Liu S, Chu J, Yang Z. 2013. Autosomal STRs provide  
13 genetic evidence for the hypothesis that Tai people originate from Southern China. *PLoS ONE*  
14 8: e60822.
- 15 Thurgood G. 1994. Tai-Kadai and Austronesian: The Nature of the Historical Relationship. *Ocean*  
16 *Ling* 33(2): 345-368.
- 17 van Driem GL. 2017. The domestications and the domesticators of Asian rice. In: Robbeets M, Saveljev  
18 A. editors. Language Dispersal Beyond Farming. Amsterdam: John Benjamins Publishing  
19 Company. p. 183–214.
- 20 Wangkumhang P, Shaw PJ, Chaichoompu K, Ngamphiw C, Assawamakin A, Nuinoon M, Sripichai O,  
21 Svasti S, Fucharoen S, Praphanphoj V, Tongsimma S. 2013. Insight into the peopling of Mainland  
22 Southeast Asia from Thai population genetic structure. *PLoS One*. 8(11):e79522.
- 23 Weber S, Lehman H, Barela T, Hawks S and Harriman D. 2010. Rice or millets: Early farming strategies  
24 in prehistoric central Thailand. *Archaeol Anthropol Sci* 2(2): 79-88.
- 25 Wen B, Li H, Gao S, Mao X, Gao Y, Li F, Zhang F, He Y, Dong Y, Zhang Y, *et al.* 2005. Genetic  
26 structure of Hmong-mien speaking populations in East Asia as revealed by mtDNA lineages.  
27 *Mol Biol Evol* 22:725–734.
- 28 Xia ZY, Yan S, Wang CC, Zheng HX, Zhang F, Liu YC, Yu G, Yu BX, Shu LL, Jin L. 2019. Inland-  
29 coastal bifurcation of southern East Asians revealed by Hmong-Mien genomic  
30 history. <https://doi.org/10.1101/730903>.
- 31 Xu S, Kangwanpong D, Seielstad M, Srikumool M, Kampuansai J, Jin L, The HUGO Pan-Asian SNP  
32 Consortium. 2010. Genetic evidence supports linguistic affinity of Mlabri-a hunter-gatherer  
33 group in Thailand. *BMC Genet* 11:18.
- 34 Yang MA, Fan X, Sun B, Chen C, Lang J, Ko YC, Tsang CH, Chiu H, Wang T, Bao Q, *et al.* 2020.  
35 Ancient DNA indicates human population shifts and admixture in northern and southern China.  
36 *Science* 369(6501):282-288.
- 37

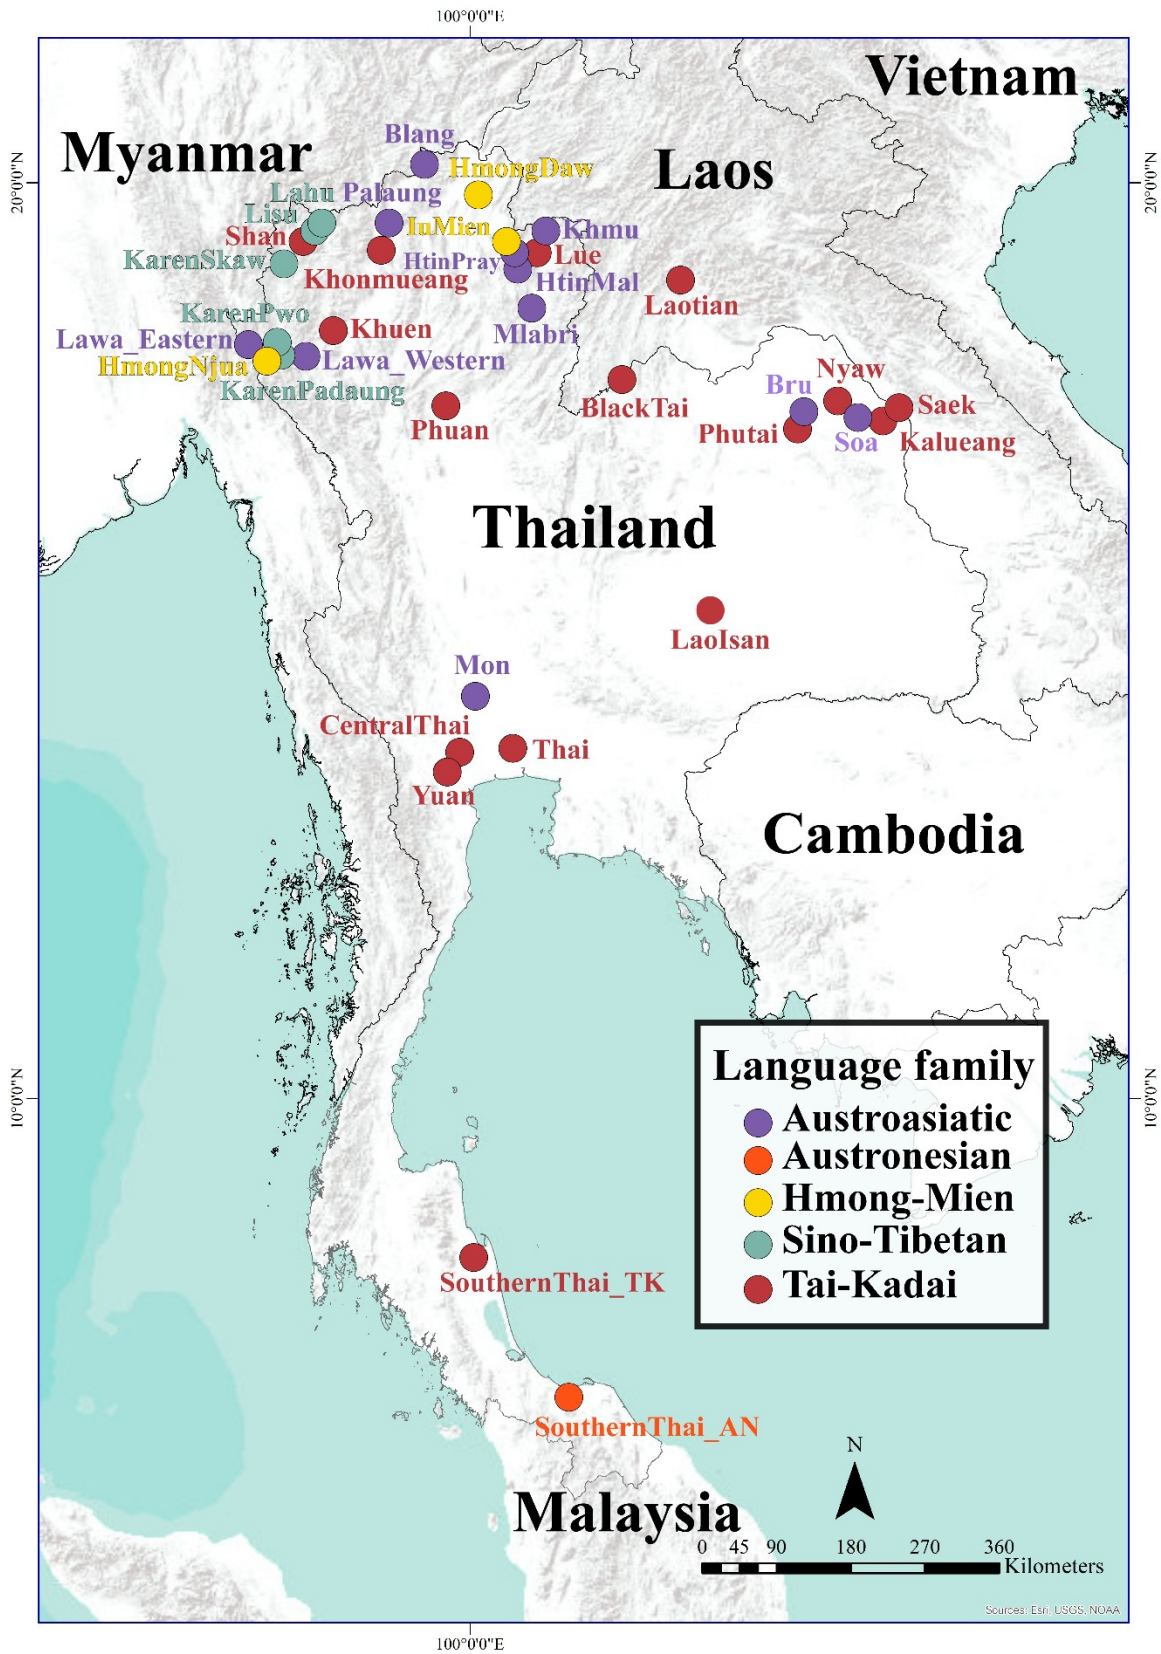

Figure 1 Map showing the location of the 36 Thai/Lao ethnolinguistic groups analyzed in this study, color-coded according to language family.



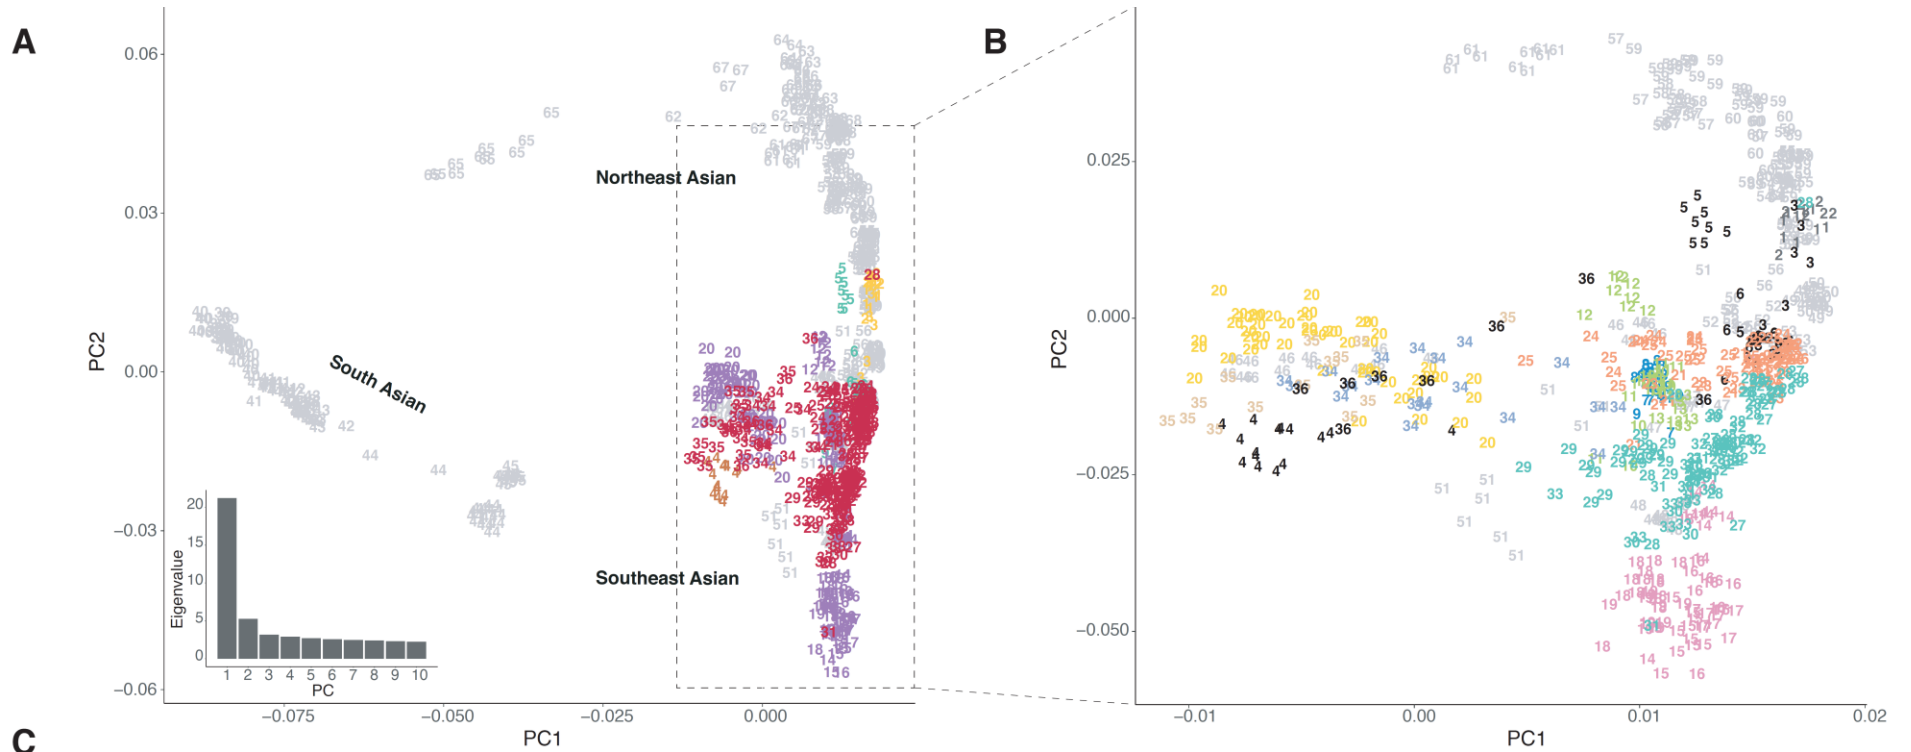

**Country (CT)**

- Thailand
- Laos
- DR Congo
- France
- India
- Philippines
- Indonesia
- Taiwan
- Cambodia
- Vietnam

**Language family (LF)**

- Hmong-Mien
- Austronesian
- Sino-Tibetan
- Austroasiatic
- Tai-Kadai
- China
- Mongolia
- Japan
- Malaysia
- Myanmar
- Central Sudanic
- Indo-European
- Dravidian
- Andamanese
- Tungusic
- Turkic
- Mongolic
- Japonic

**Subgroup (SG)**

- Hmong\_HM
- Karen\_ST
- Palaungic\_AA
- Khmu\_Katu\_AA
- Monic\_AA
- N\_TK
- NE\_TK
- C\_TK
- S\_TK
- Other

**Figure 2 Population structure analyses.** (A) Plot of PC1 vs. PC2 for the SNP data for individuals from South Asia, Northeast Asia and Southeast Asia. Individuals are numbered according to population, as indicated in Supplementary Table 1 and in the population labels in panel (C). Thai/Lao groups are colored by language family according to the key at the bottom of panel (C) while other groups are in grey (see Supplementary Figure 3 for the same PC plot with all samples colored by country and by language family). The eigenvalues from PC1 to PC10 are shown on the bottom left side. (B) Plot focusing on Southeast Asian and Chinese populations speaking AA, AN, HM, ST, and TK languages, zoomed-in from (A). Thai/Lao groups are colored according to subgroup while other groups are in grey. (C) ADMIXTURE results for  $K = 5$  and  $K = 6$ . Each individual is represented by a bar, which is partitioned into  $K$  colored segments that represent the individual's estimated membership fractions in each of the  $K$  ancestry components. Populations are separated by black lines for modern populations and excavation sites and time periods are separated by black lines for ancient samples. The three colored bars at the top of the plot indicate the country (top), language family (middle) and subgroup (bottom) for each sample, according to the key at the bottom. The PCA analysis was performed on the pruned dataset of 842 individuals and 153,191 SNPs, while the ADMIXTURE analysis was performed on the pruned dataset of 895 individuals (including 10 Mbuti, 10 French, and 33 ancient individuals) and 158,772 SNPs; the highly drifted modern populations (Onge, Mlabri, and Mamanwa) and ancient samples were projected in ADMIXTURE analyses (see PCA with ancient samples projected in Supplementary Figure 3).

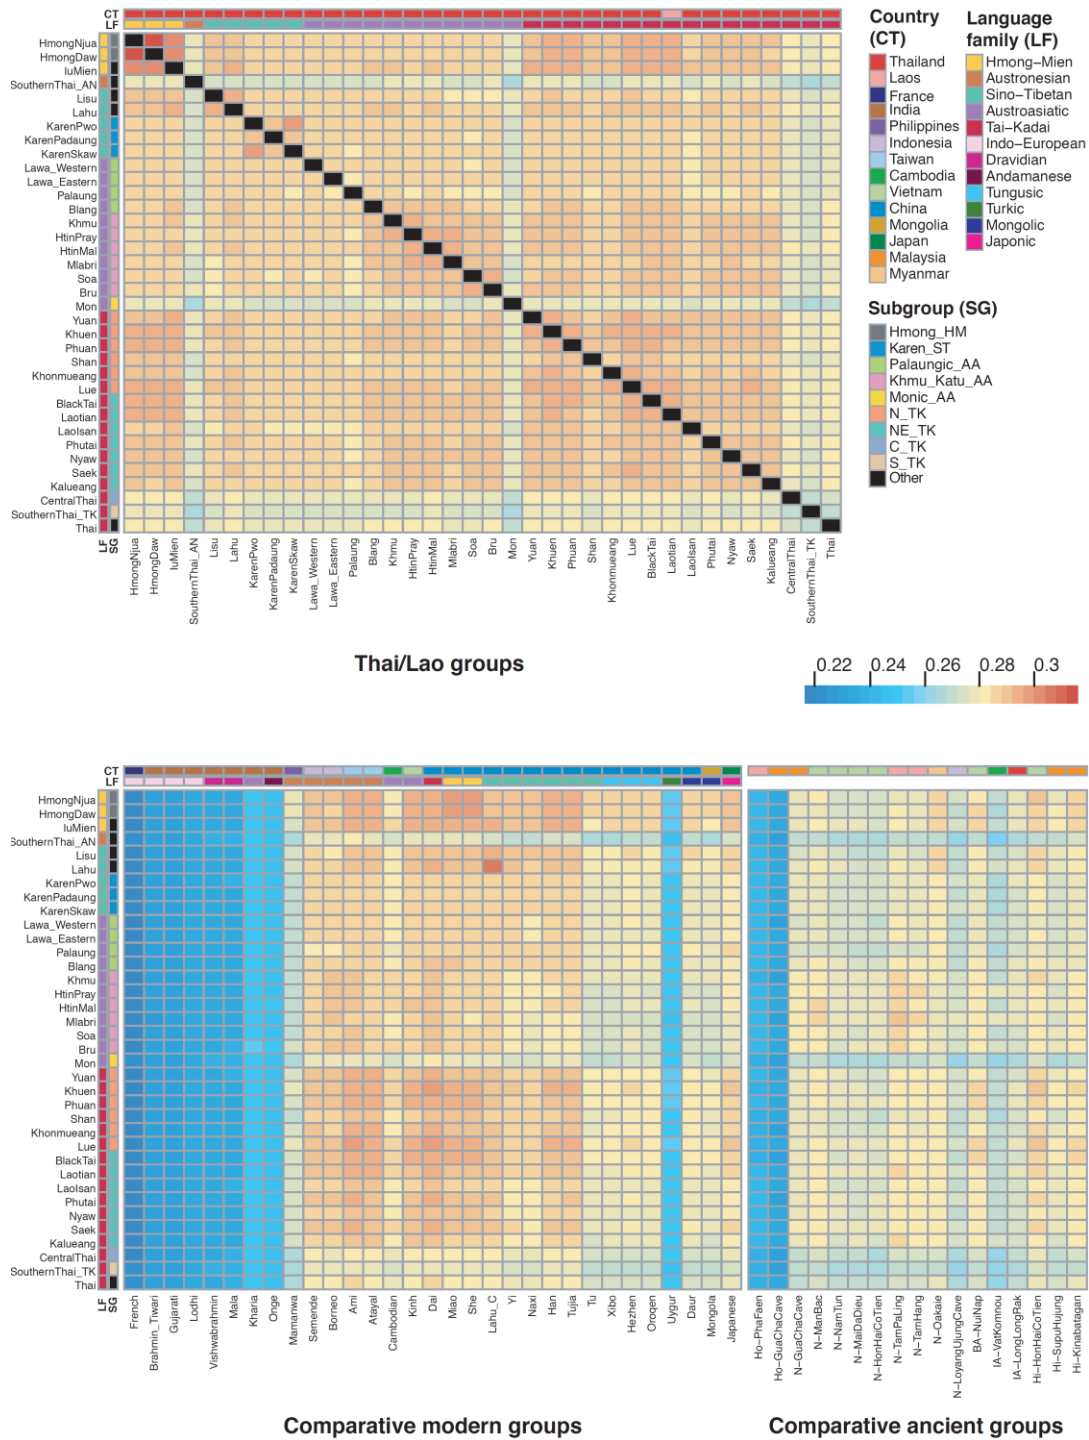

**Figure 3 Population allele sharing profiles based on  $f_3$  statistics.** Heatmap of outgroup  $f_3$  statistics (Thai/Lao groups, X; Mbuti) among Thai/Lao groups (upper) panel, and between Thai/Lao and other comparative modern Asian populations and ancient samples (lower). Black blocks denote missing values. The two colored bars at the top of the plot indicate the country (top) and language family (bottom) for each comparative population; and those on the side indicate language family (left) and subgroup (right) for each Thai/Lao group, according to the key at the right.

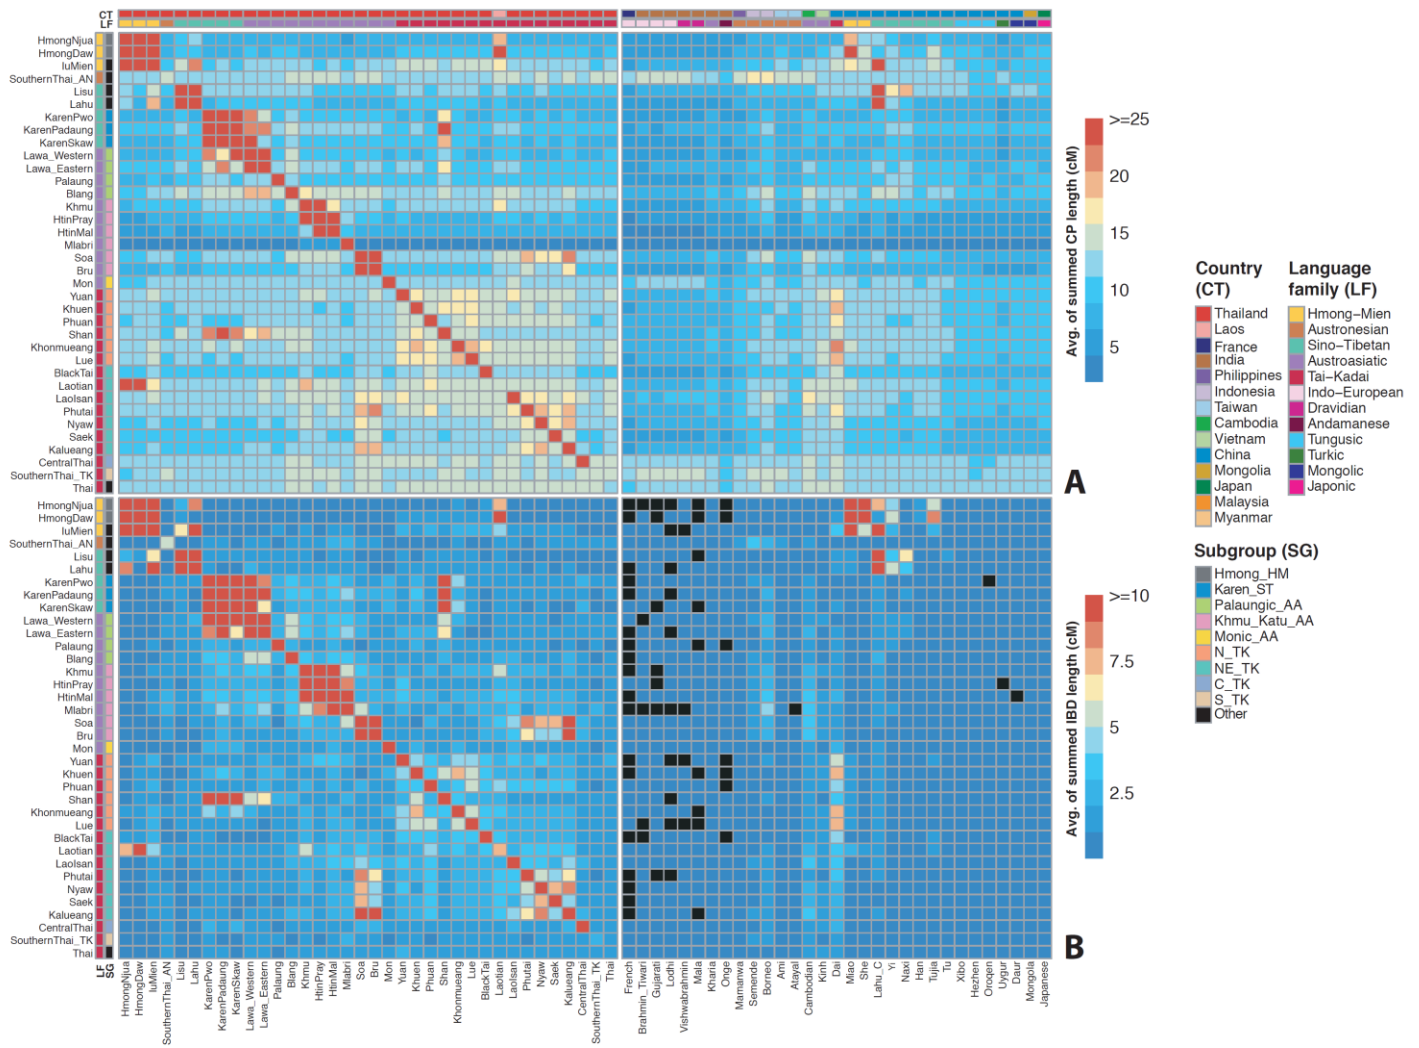

**Figure 4 Haplotype sharing profiles as inferred by the ChromoPainter and IBD analyses.** The color bars at the top denote the countries and language families while the color bars at the left denote countries and subgroups, according to the keys. (A) Heatmap of ChromoPainter results in which the recipient Y (Thai/Lao groups) is painted by donor X (Thai/Lao and other modern Asian populations), with Y denoted by each row and X denoted by each column. The heatmap is scaled by the average length in centimorgans of the summed painted chromosomal chunks of the recipient individuals from the donor individuals. (B) Heatmap of IBD sharing among Thai/Lao comparisons and between Thai/Lao and other modern Asian populations. The heatmap is scaled by the average length in centimorgans of summed IBD blocks shared between individuals from the two groups. Black blocks denote missing values.

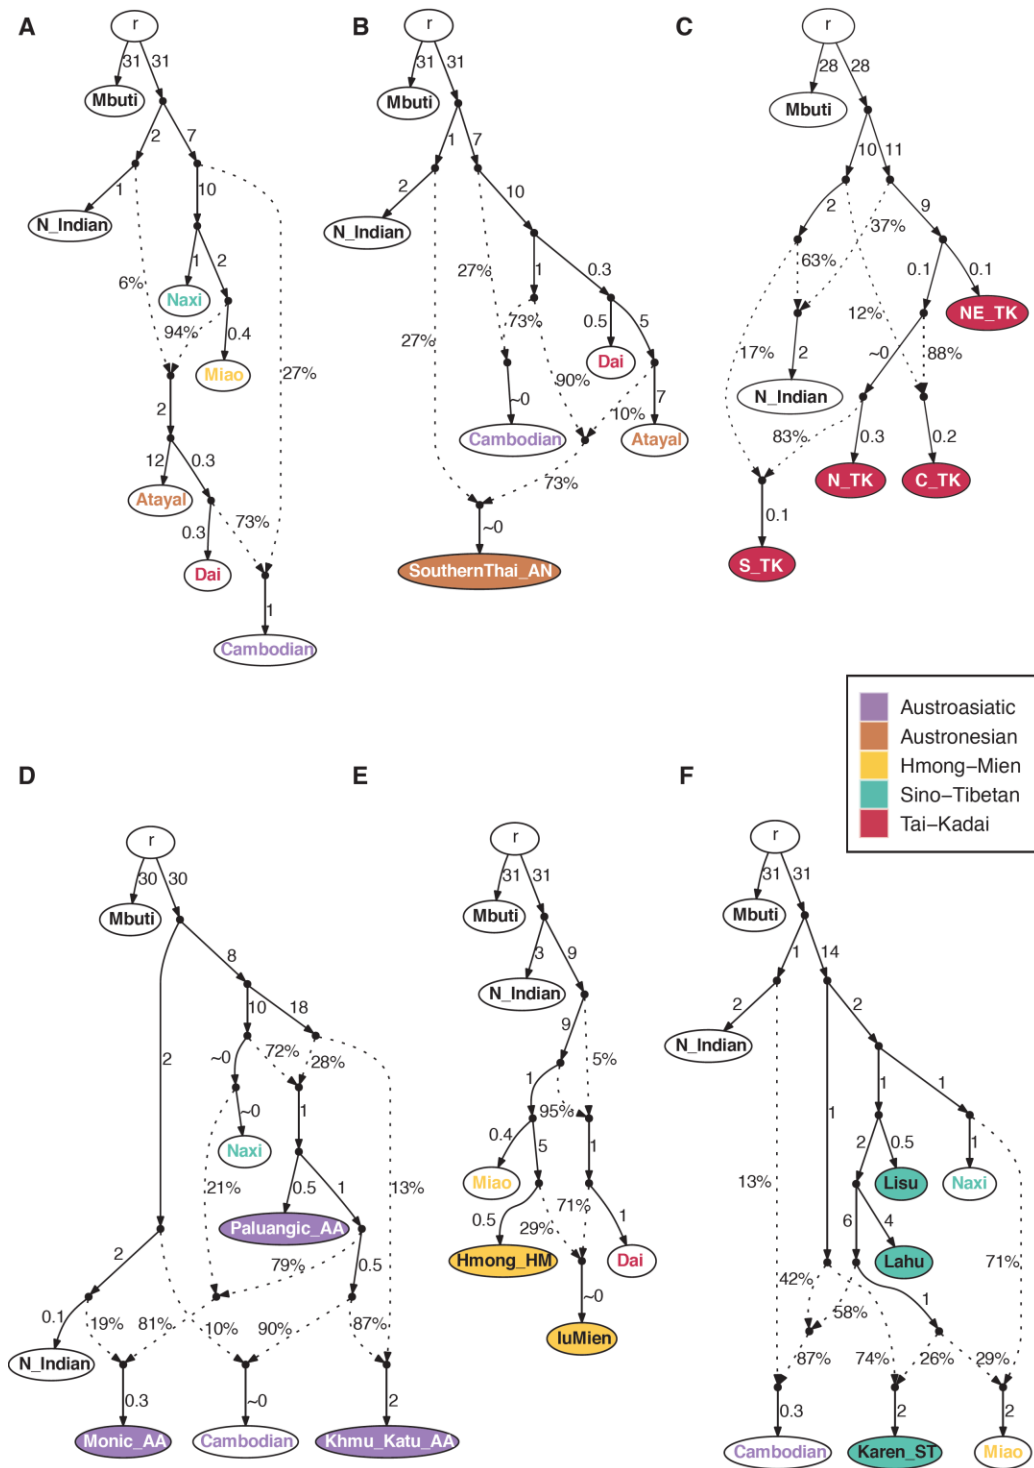

**Figure 5 Admixture graphs for the Thai/Lao groups, for each language family.** The node *r* denotes the root.

White nodes denote backbone populations. Backbone population labels and Thai/Lao nodes are colored according to language family. Dashed arrows represent admixture edges, while solid arrows are drift edges reported in units of  $F_{ST} \times 1,000$ . (A) backbone populations (worst-fitting  $Z = 0.861$ ). (B) AN group (worst-fitting  $Z = -1.713$ ). (C) TK groups (worst-fitting  $Z = -2.270$ ). (D) AA groups (worst-fitting  $Z = 2.101$ ). (E) HM groups (worst-fitting  $Z = -2.028$ ). (F) ST groups (worst-fitting  $Z = -2.873$ ).

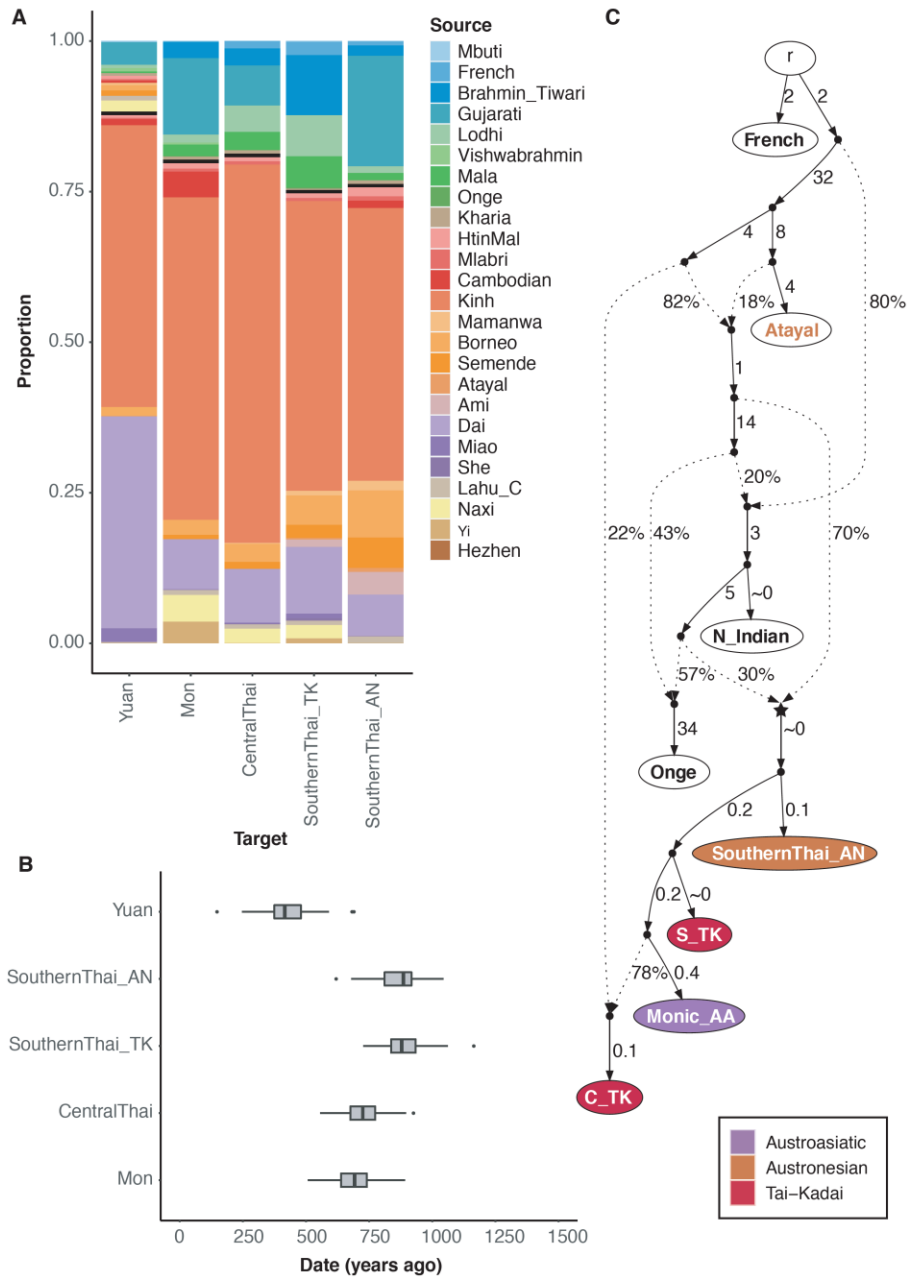

**Figure 6 Investigation of putative SA-related admixture.** (A) GLOBETROTTER estimation of admixture sources for four Thai groups (Mon, Central Thai, SouthernThai\_TK and SouthernThai\_AN) with putative SA-related ancestry, and for the Yuan group as a control without putative SA-related ancestry. Different sources are denoted by different colors. (B) GLOBETROTTER estimates of the admixture date in the SA-influenced Thai groups. Results are based on 100 bootstraps. (C) Admixture graph for the Thai groups with SA-related admixture (worst-fitting  $Z = -1.646$ ). The node  $r$  denotes the root. White nodes denote backbone populations. The star-shaped node denotes the N\_Indian-related source contributing to all of the SA-related Thai groups. Backbone population labels and Thai nodes are colored according to language family. Dashed arrows represent admixture edges, while solid arrows are drift edges reported in units of  $F_{ST} \times 1,000$ .
